# Supplementary material for: Highly α-position regioselective ring-opening of epoxides catalyzed by halohydrin dehalogenase from Ilumatobacter coccineus: a biocatalytic approach to 2-azido-2-aryl-1-ols
Source: Royal Society of Chemistry journal article supplement (doi:10.1039/c9ra03774h), 2019-01-01

## Supporting Information

**Highly  $\alpha$ -position regioselective ring-opening of epoxides catalyzed by halohydrin dehalogenase from *Ilumatobacter coccineus*: a biocatalytic approach to 2-azido-2-aryl-1-ols**

### **Authors:**

Miao An, Wanyi Liu, Xiaoying Zhou, Ran Ma, Huihui Wang, Baodong Cui, Wenyong Han, Nanwei Wan,\* and Yongzheng Chen\*

### **Affiliations:**

Key Laboratory of Biocatalysis & Chiral Drug Synthesis of Guizhou Province, Generic Drug Research Center of Guizhou Province, Green Pharmaceuticals Engineering Research Center of Guizhou Province, School of Pharmacy, Zunyi Medical University, Zunyi, 563000, China.

### **\*Corresponding author:**

Dr. Nanwei Wan, E-mail: nanweiwan@zmc.edu.cn

Dr. Prof. Yongzheng Chen, E-mail: yzchen@zmc.edu.cn

## 1. General experimental information

Column chromatography was performed on silica gel (200-400 mesh). TLC was performed on silica gel. <sup>1</sup>H NMR (400 MHz) chemical shifts were reported in ppm ( $\delta$ ) relative to tetramethylsilane (TMS) with the solvent resonance employed as the internal standard. Data were reported as follows: chemical shift, multiplicity (s = singlet, d = doublet, t = triplet, dd = doublet of doublets, dq = doublet of quartets, qd = quartet of doublets, m = multiplet), coupling constants (Hz) and integration. <sup>13</sup>C NMR (100 MHz) chemical shifts were reported in ppm ( $\delta$ ) from tetramethylsilane (TMS) with the solvent resonance as the internal standard.

Chemicals epoxides **1a**, **1f**, **1g**, **1h** were purchased from J&K Chemical (Shanghai, China). The other epoxides were prepared from olefins according to the reported procedures.<sup>1</sup> Isopropyl- $\beta$ -D-thiogalactopyranoside (IPTG, >99%) and kanamycin sulfate salt (>99%) were purchased from Solarbio (Beijing, China). All the other biological, chemical reagents and solvents were obtained from commercial suppliers and used without further purification.

## 2. HPLC analysis method

The HPLC analysis was performed on SPD-M20A equipped with Chiralcel OJ-H chiral column (4.6 mm $\Phi$ ×250 mmL) purchased from Daicel Chemical Industries. Analysis method for (*R*, *S*)-**2a**: 2-propanol:hexane = 5:95, 0.5 mL/min, 220 nm. The retention times for (*S*)-**2a** and (*R*)-**2a** were 25.5 min and 26.3 min, respectively.

## 3. Reference

1. Bernasconi S, Orsini F, Sello G, et al. Bacterial monooxygenase mediated preparation of nonracemic chiral oxiranes: study of the effects of substituent nature and position. *Tetrahedron: Asymmetry*, 2004, 15(10): 1603-1606.

## 4. NMR spectra of **2a-2k**

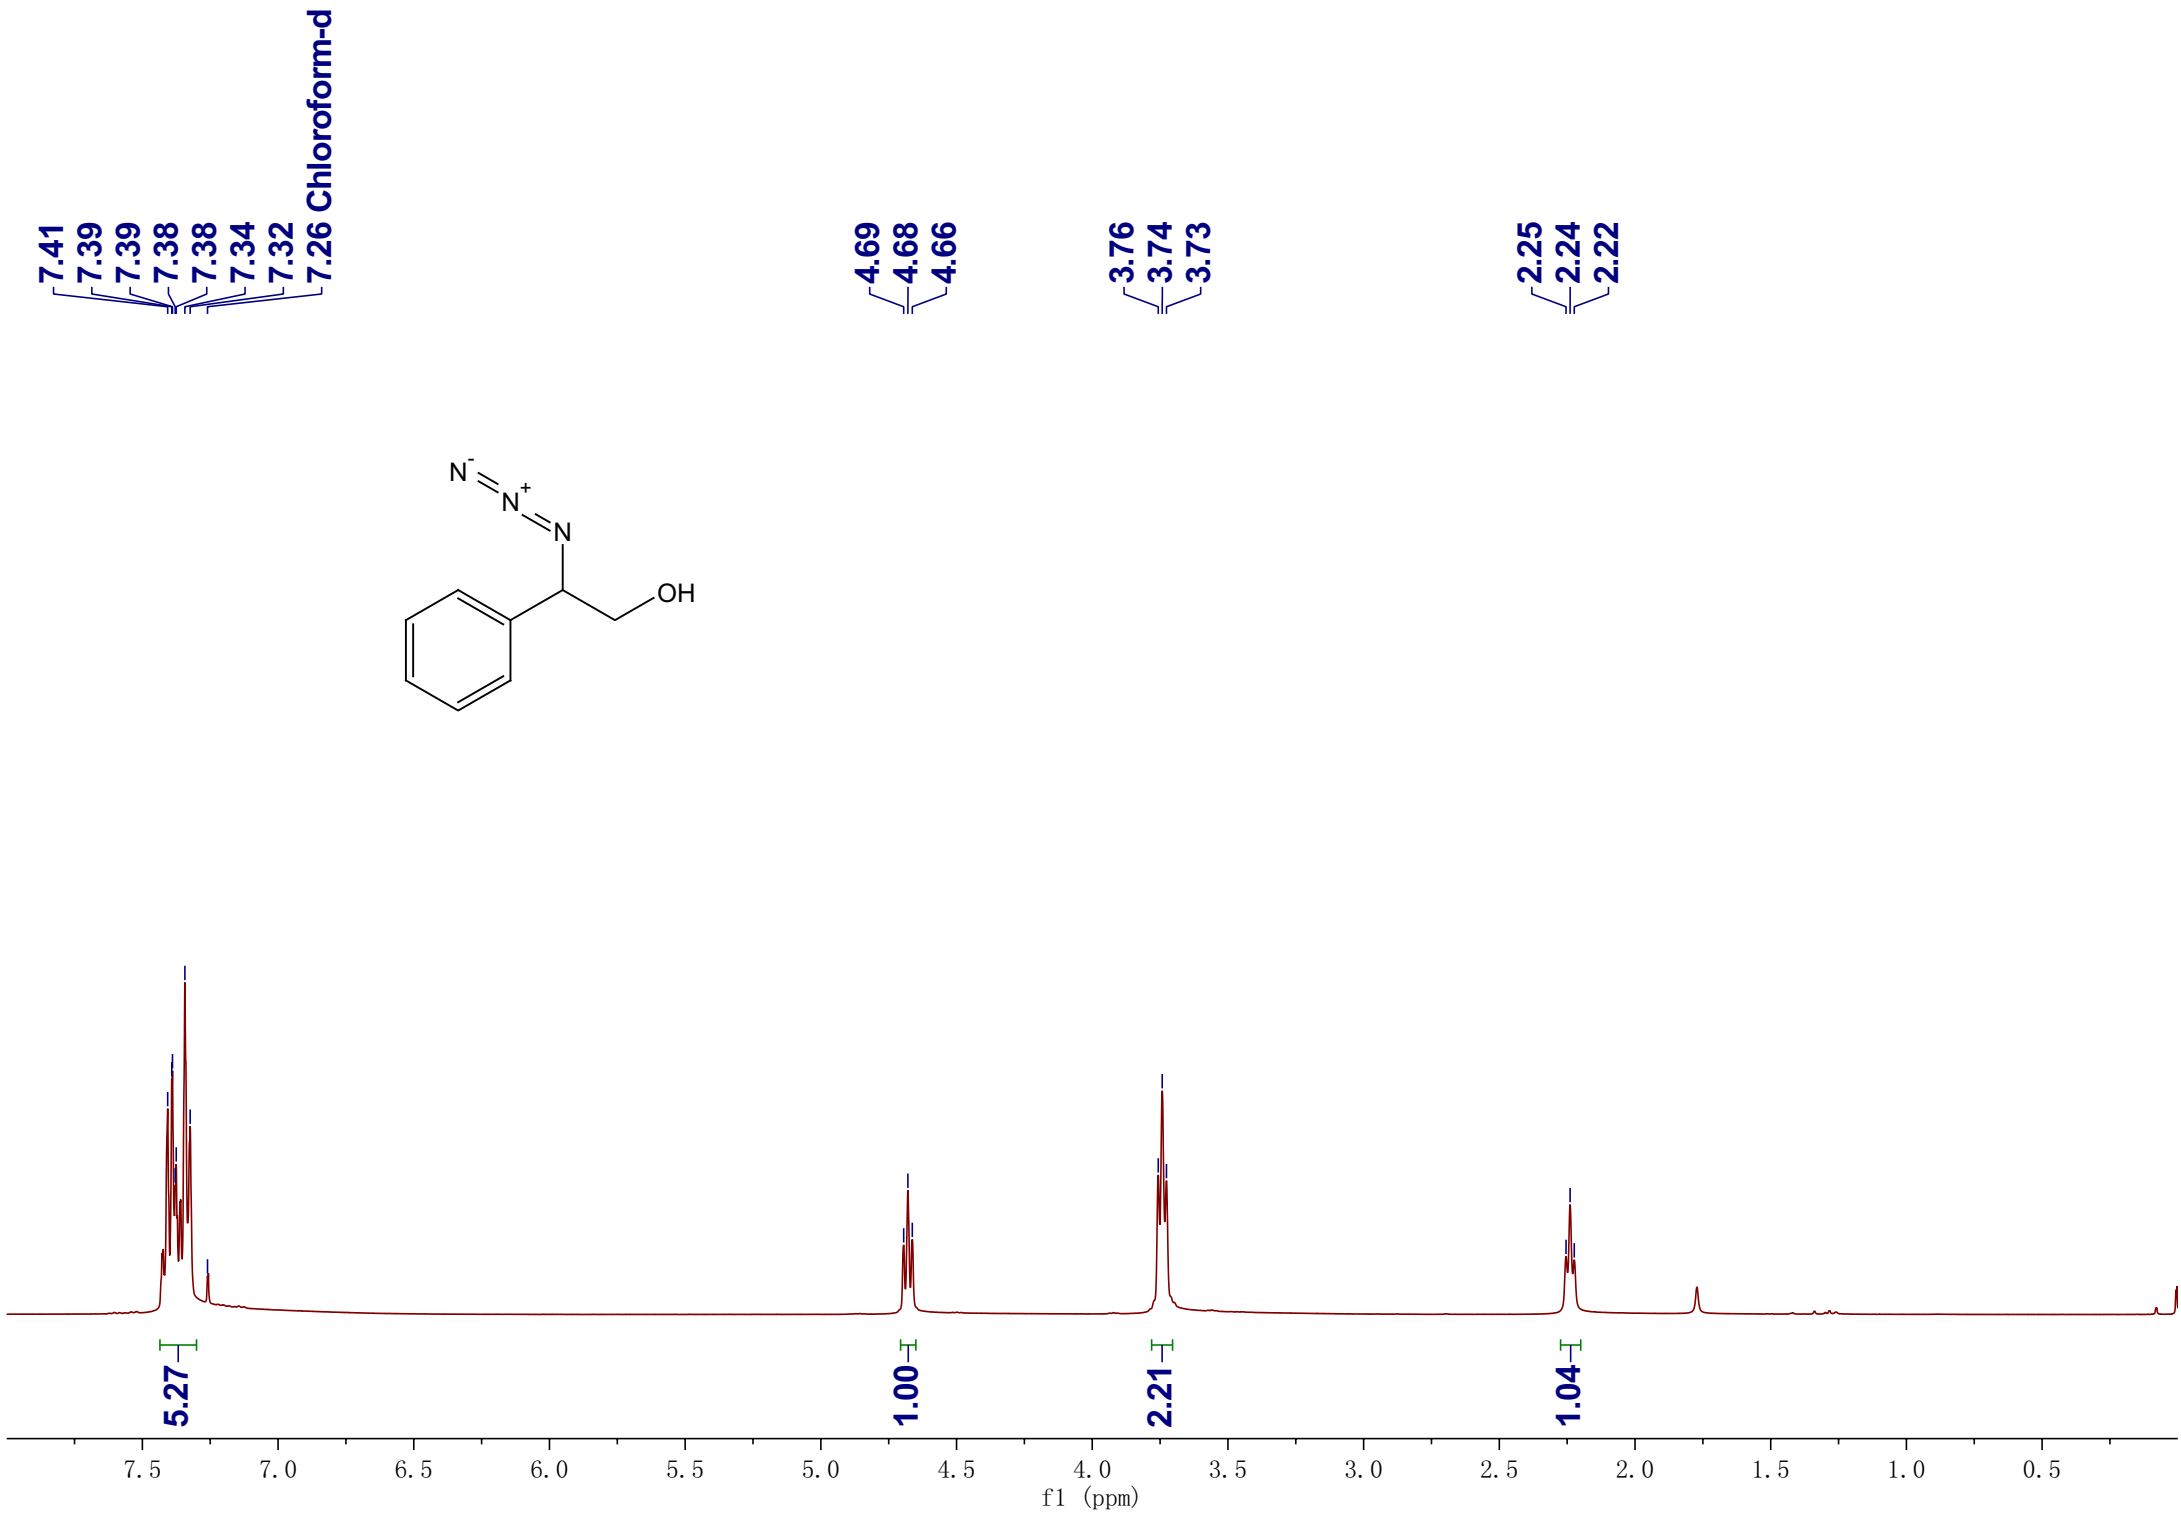

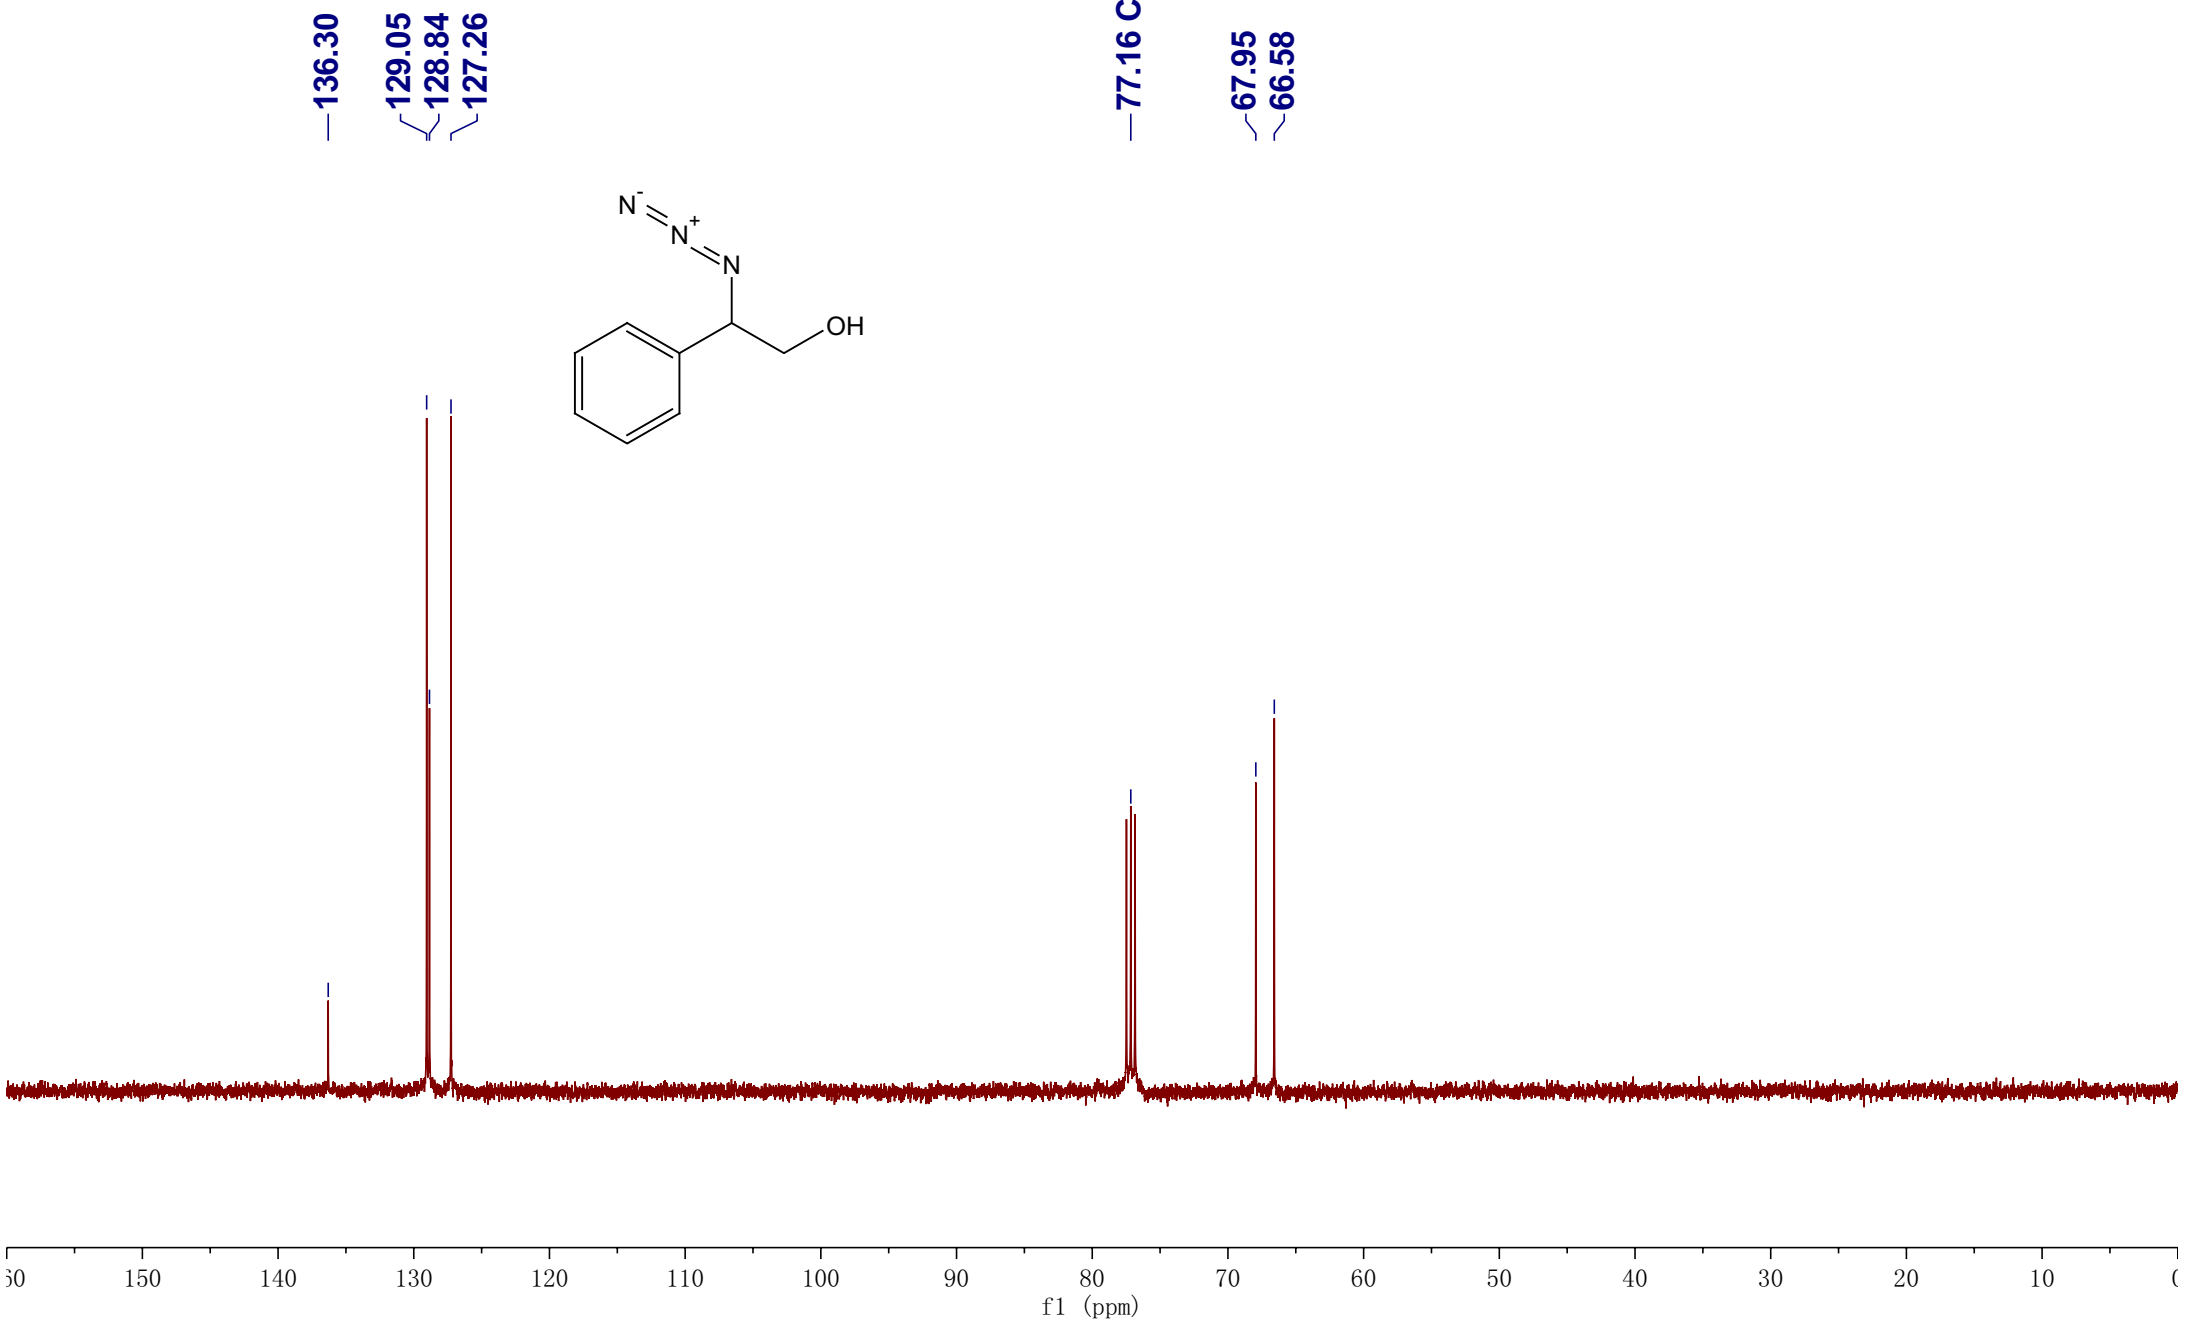

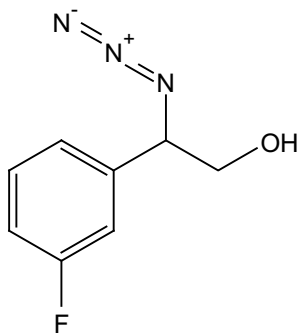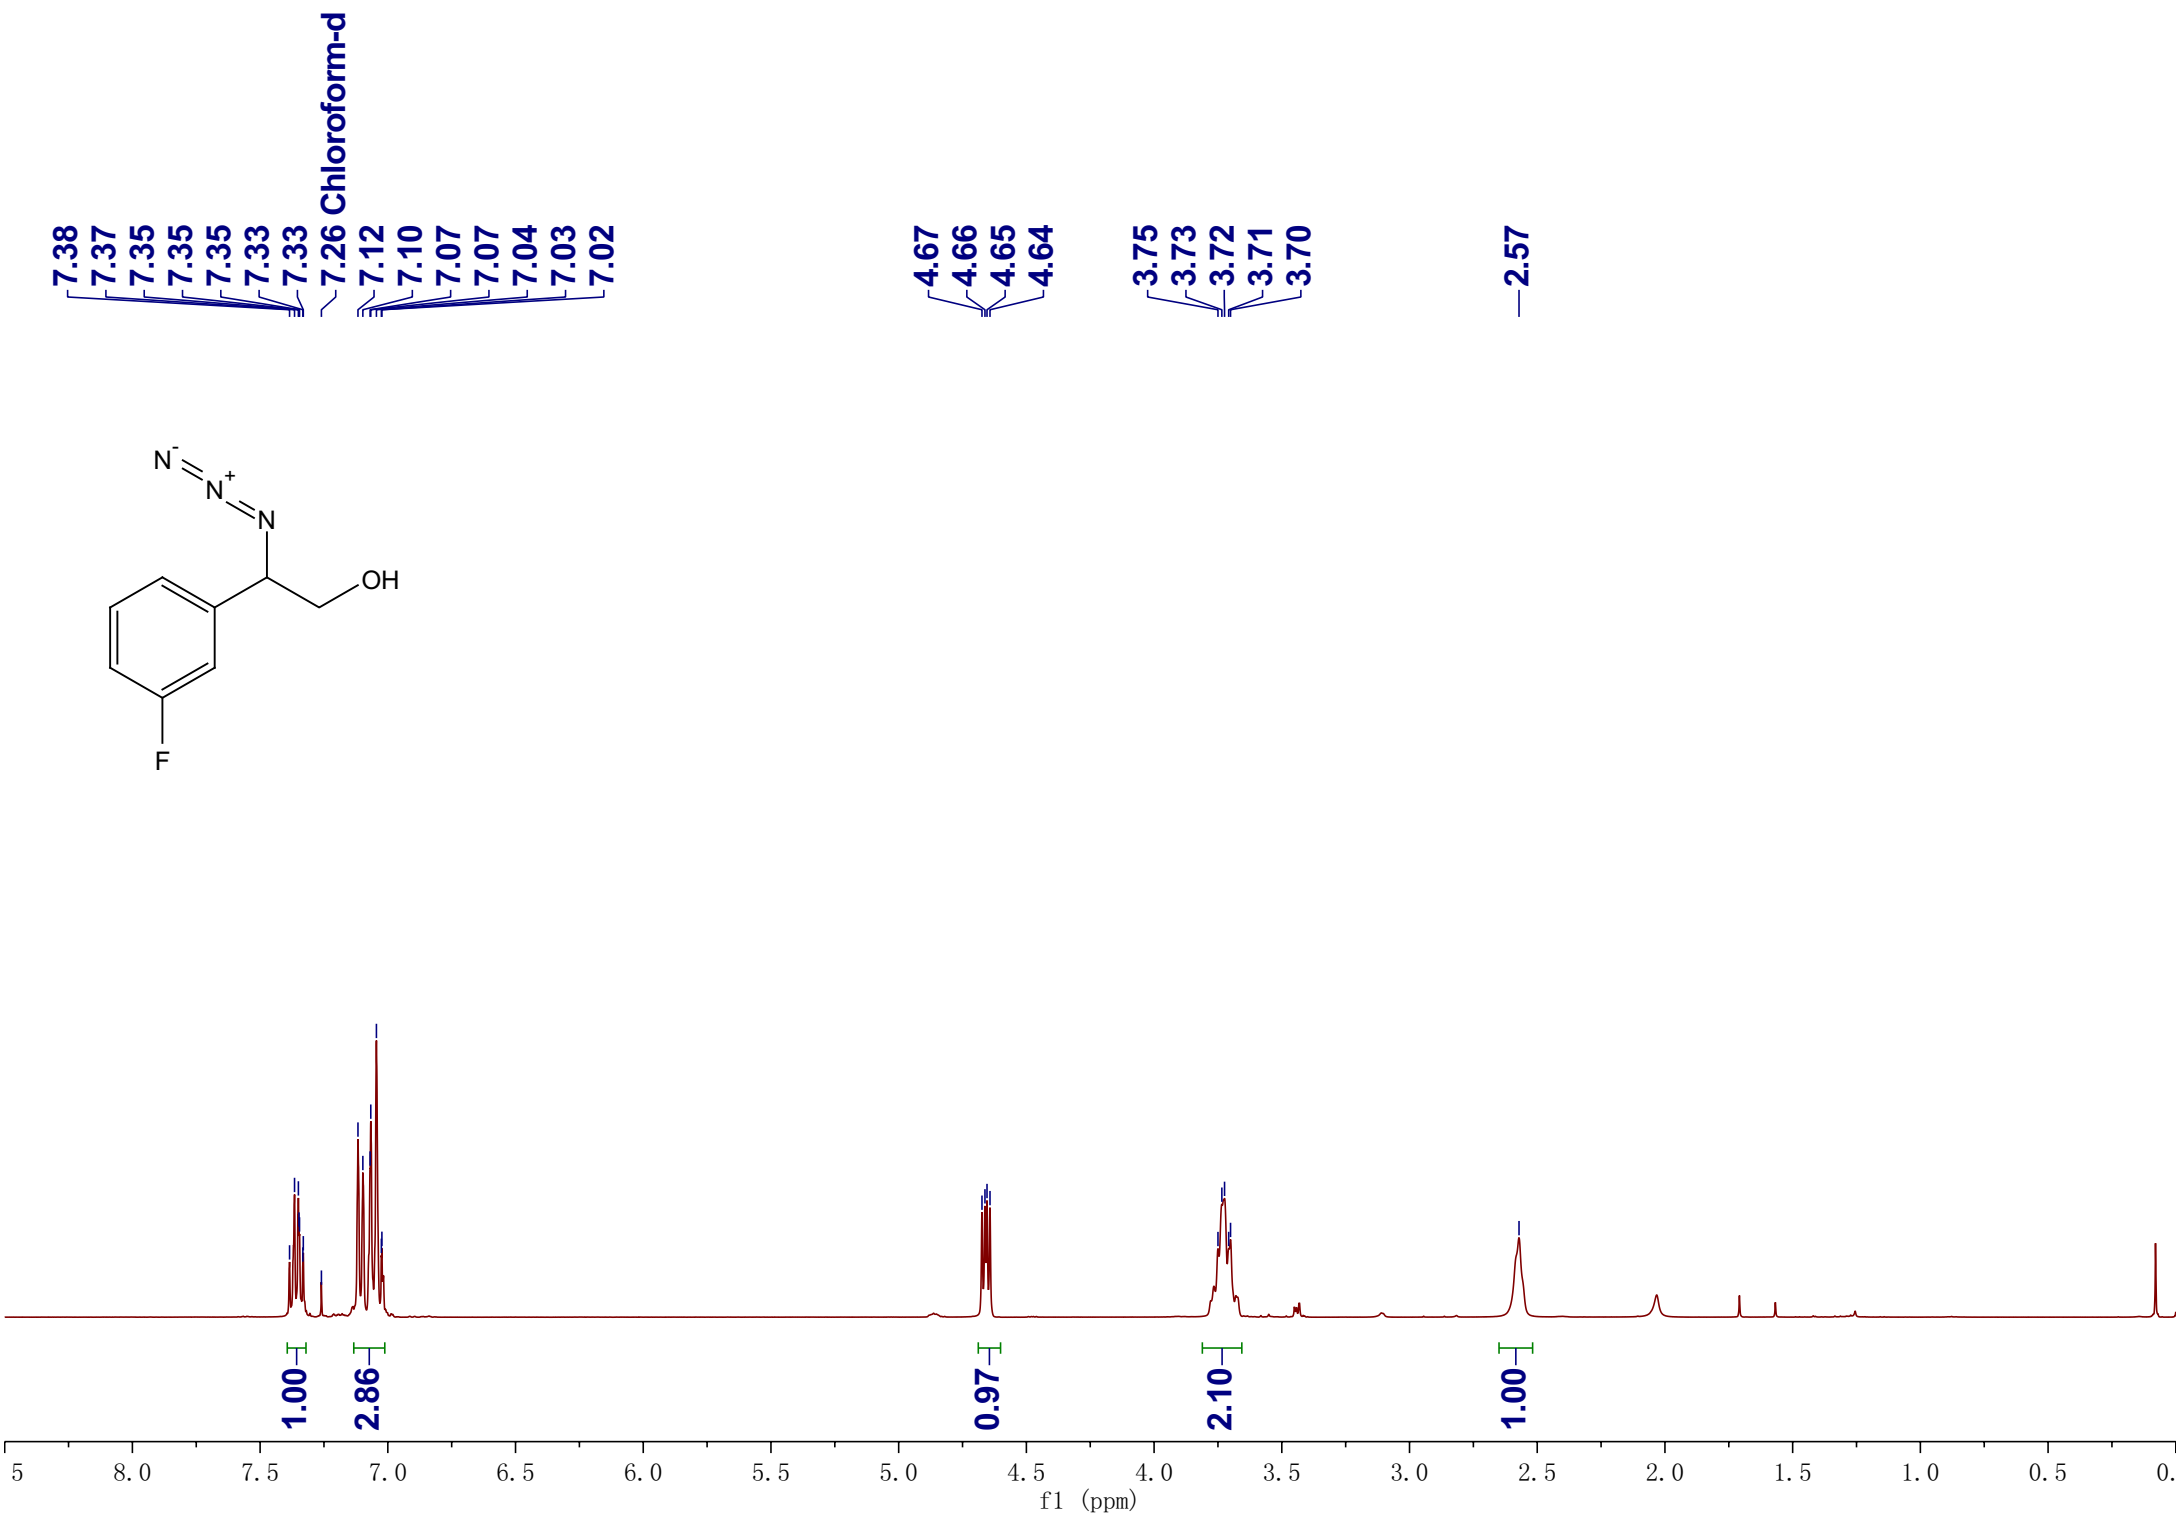

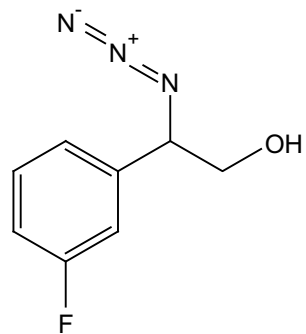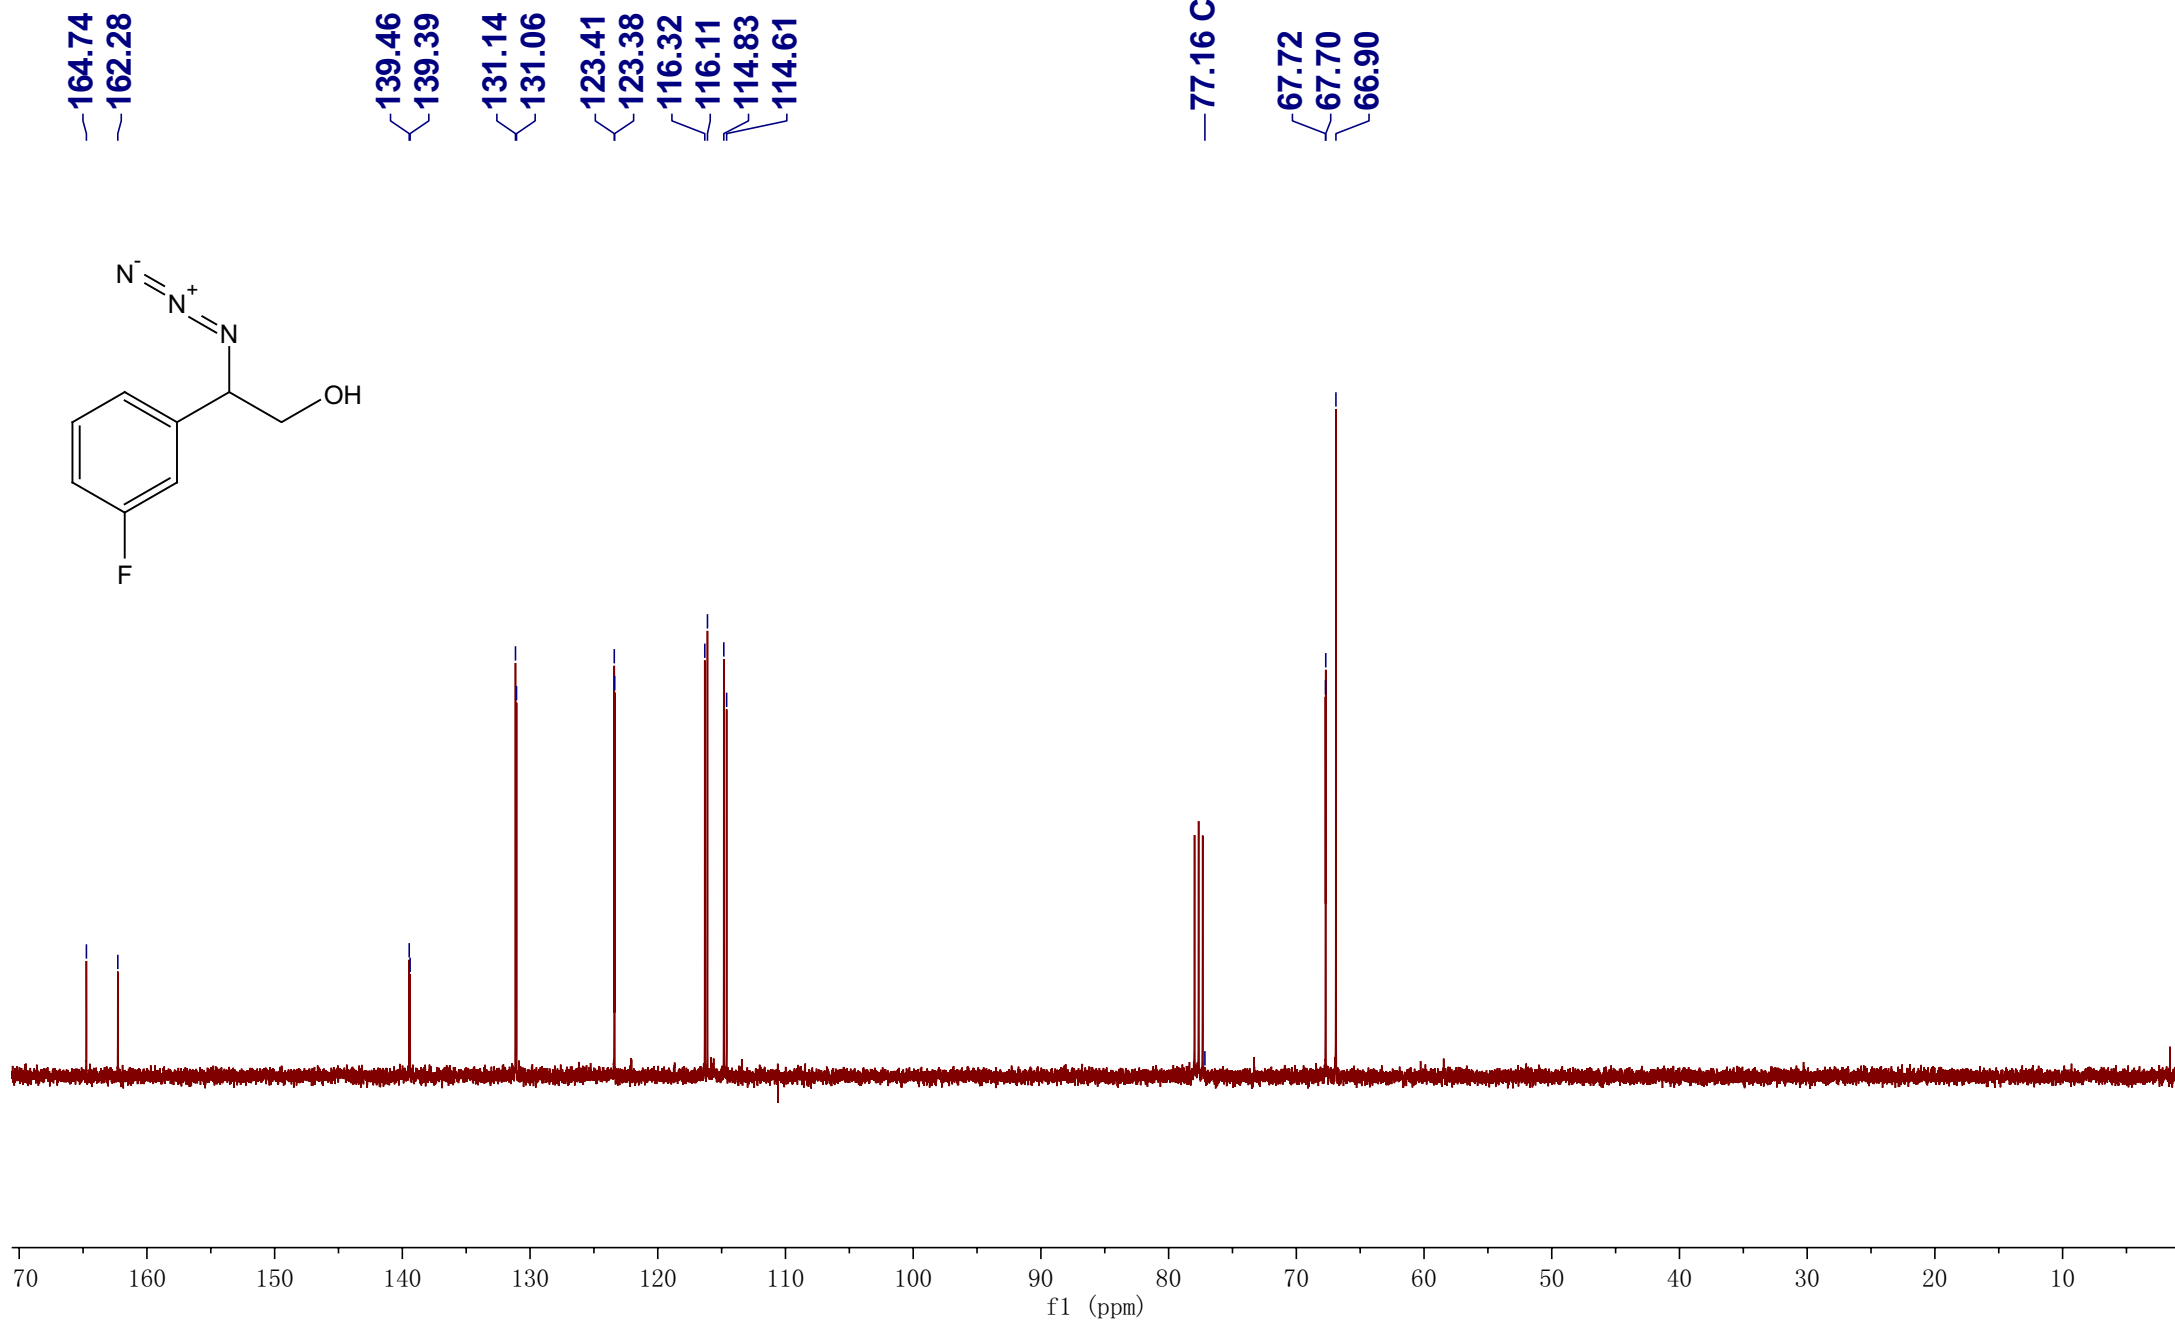

Chloroform-d

7.33  
7.32  
7.26  
7.21  
7.21

4.66  
4.64  
4.64  
4.62

3.74  
3.72  
3.70

2.30

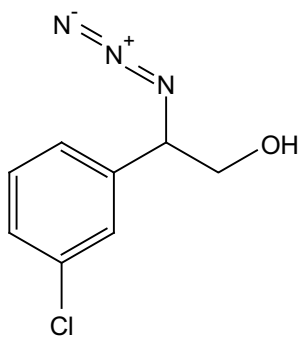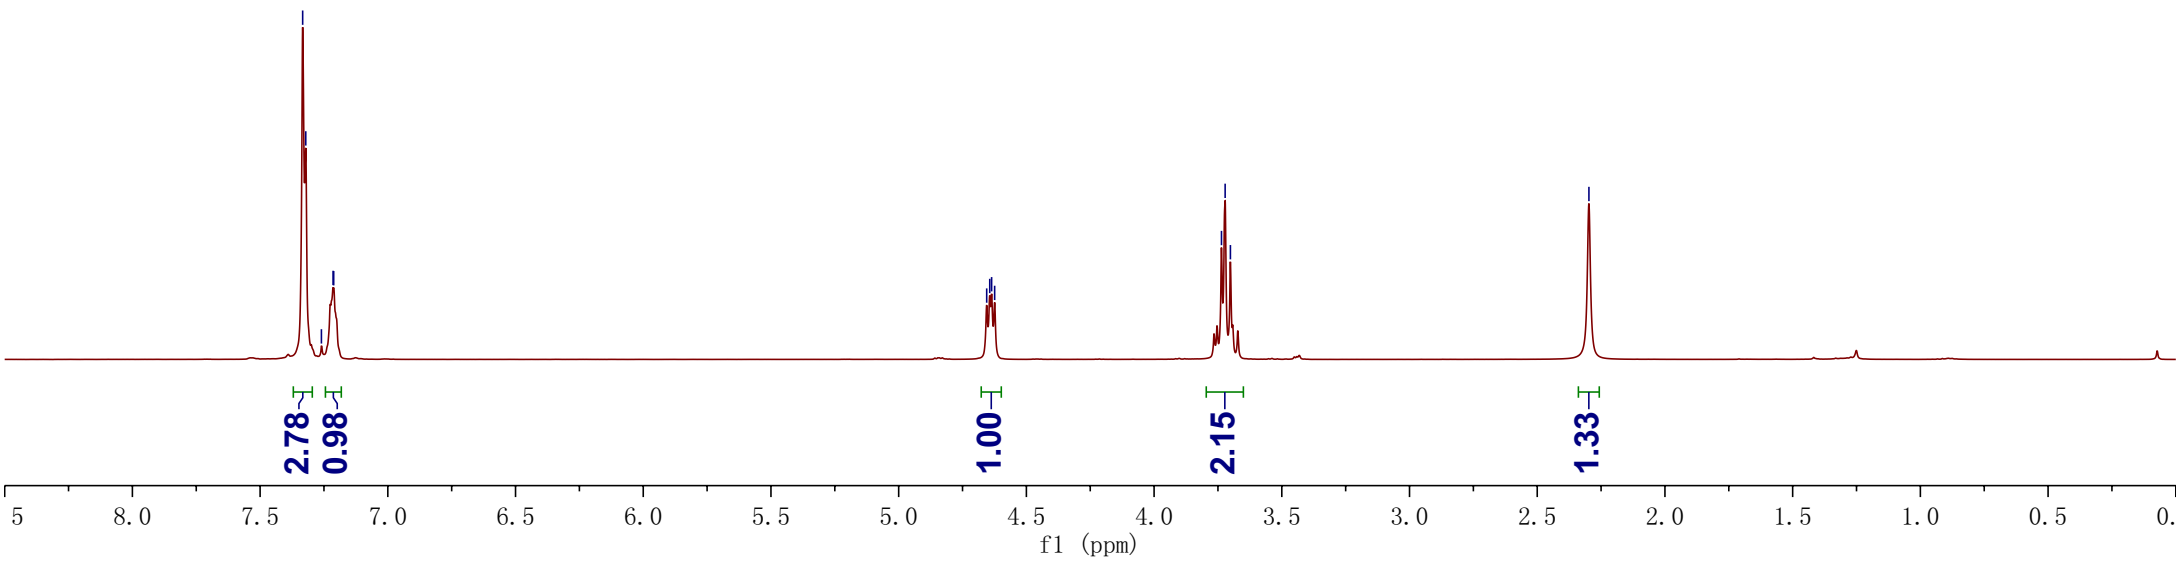

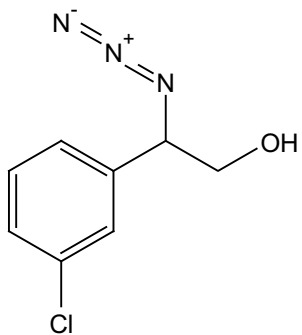

138.12  
134.54  
129.93  
128.59  
127.01  
125.04

77.16 Chloroform-d

66.84  
66.08

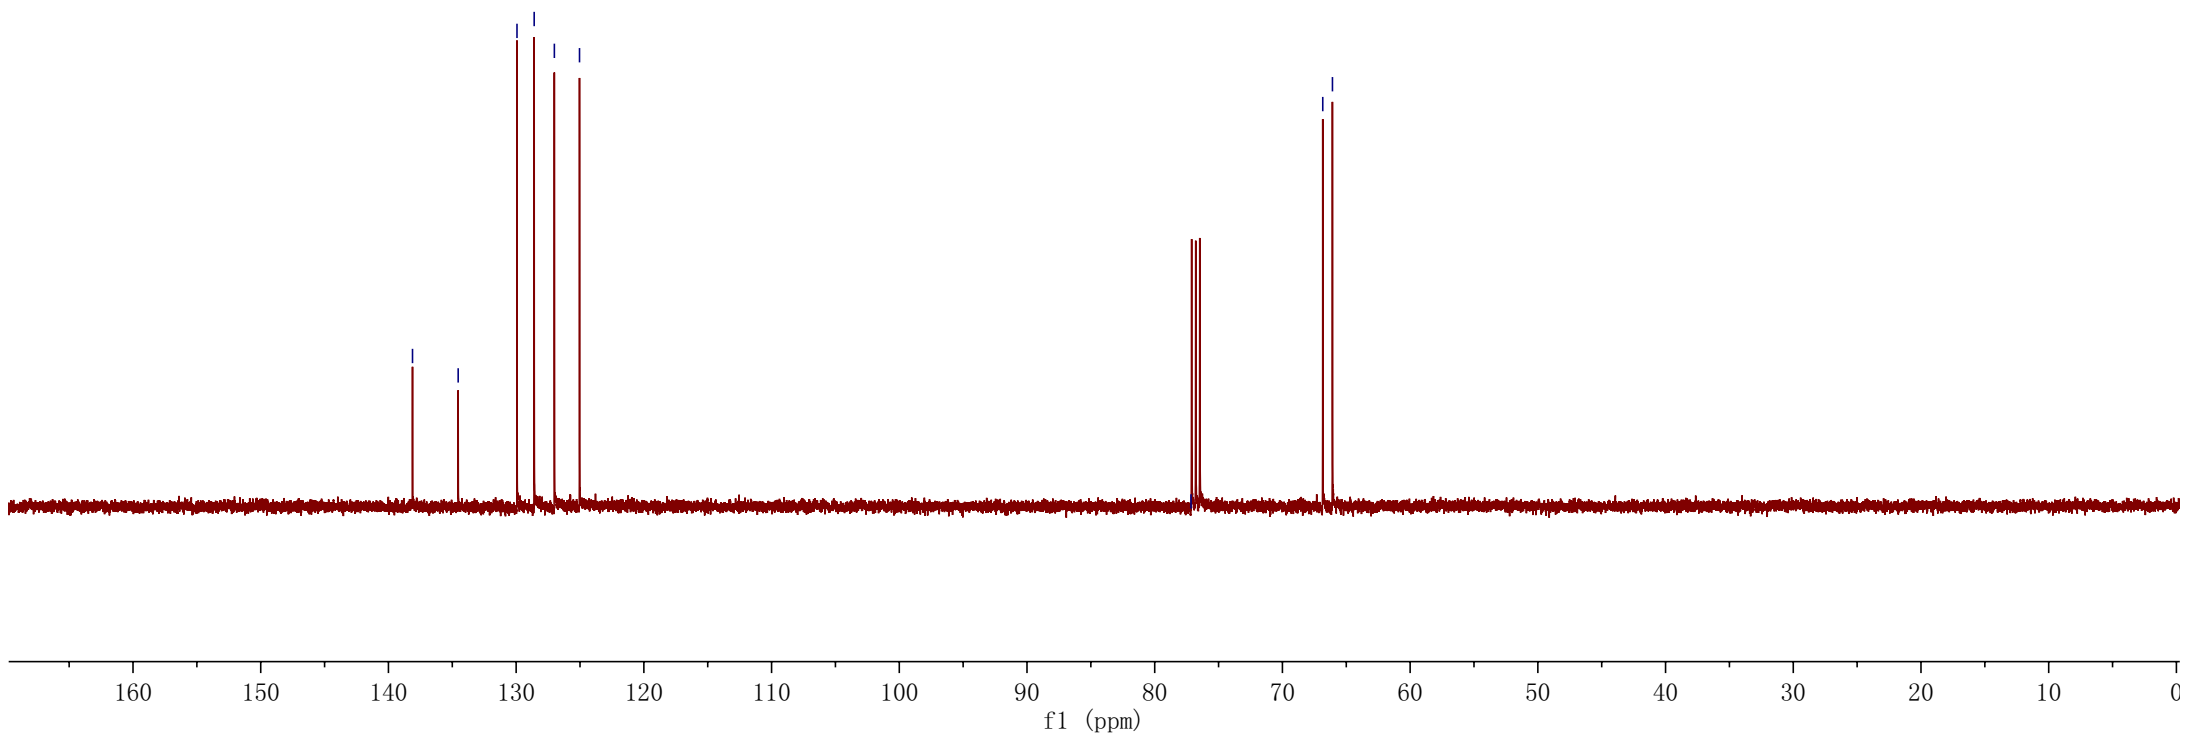



7.47  
7.46  
7.45  
7.45  
7.44  
7.26 Chloroform-d  
7.24  
7.24  
7.23  
7.23

4.61  
4.60  
4.59  
4.58  
3.73  
3.72  
3.70  
3.69  
3.69  
3.67  
3.66  
3.64  
2.68

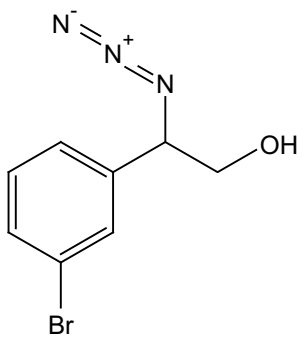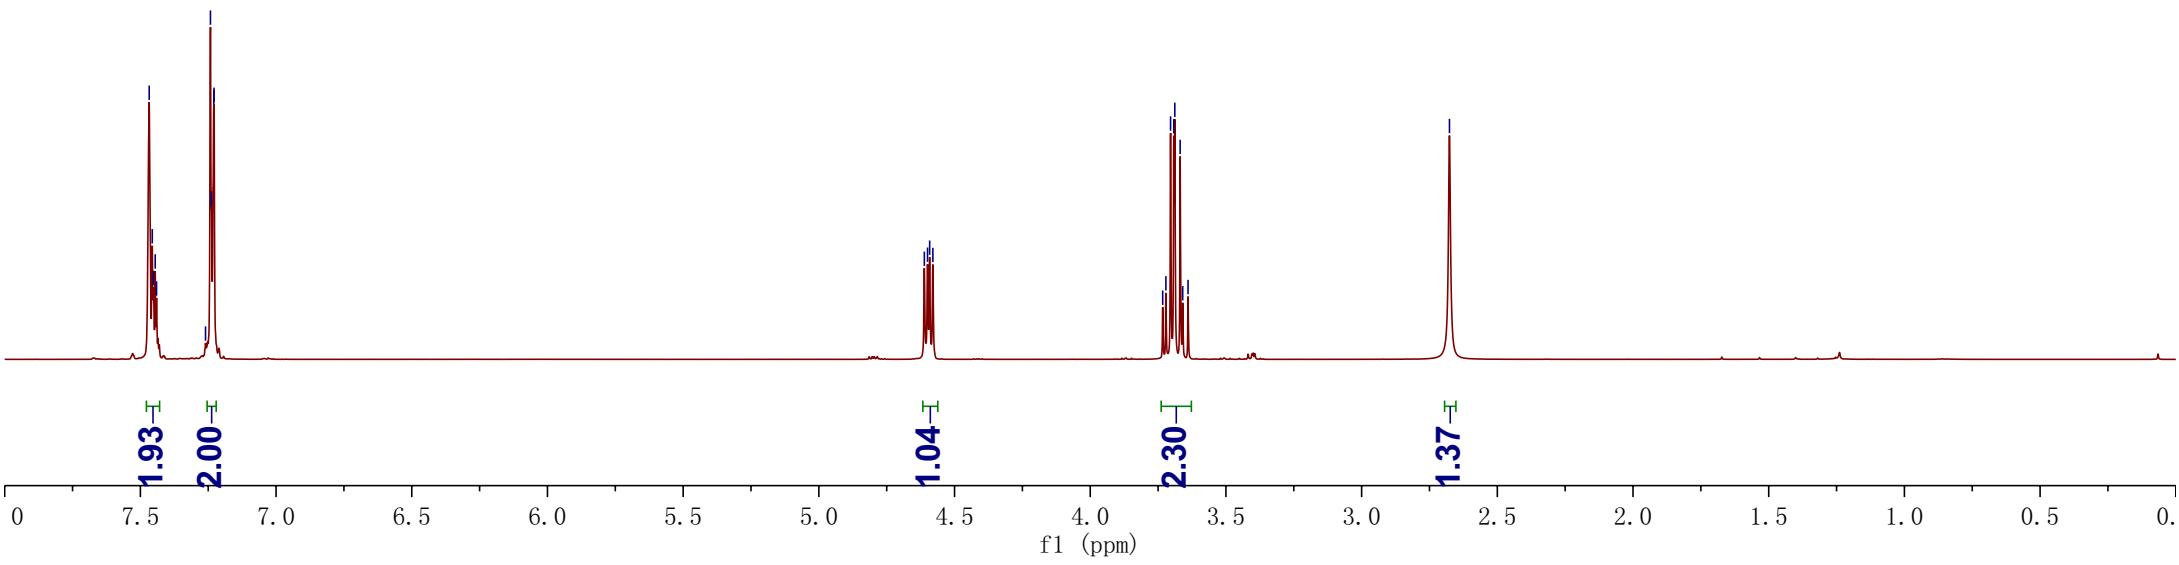

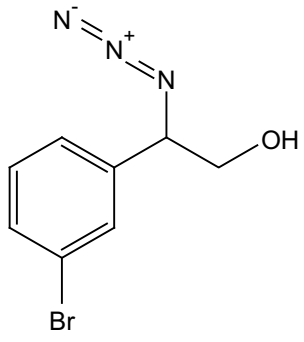

138.55  
131.61  
130.32  
130.04  
125.64  
122.79

77.16 Chloroform-d

66.86  
66.15

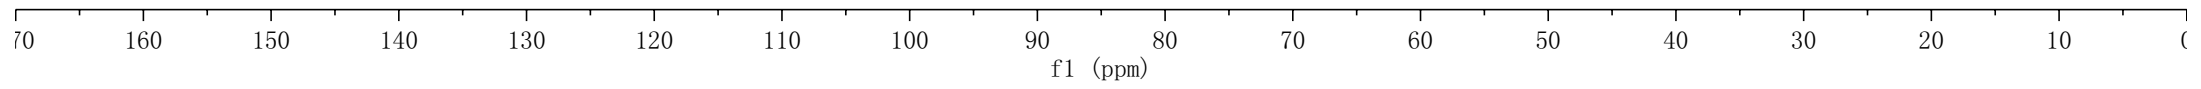

7.27  
7.25  
7.24  
7.16  
7.14  
7.12  
7.10

4.64  
4.62  
4.61

3.73  
3.71

2.36

1.24

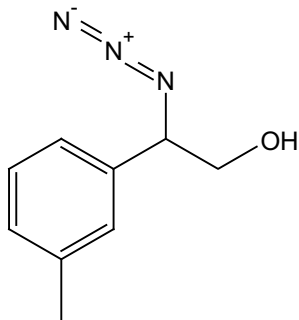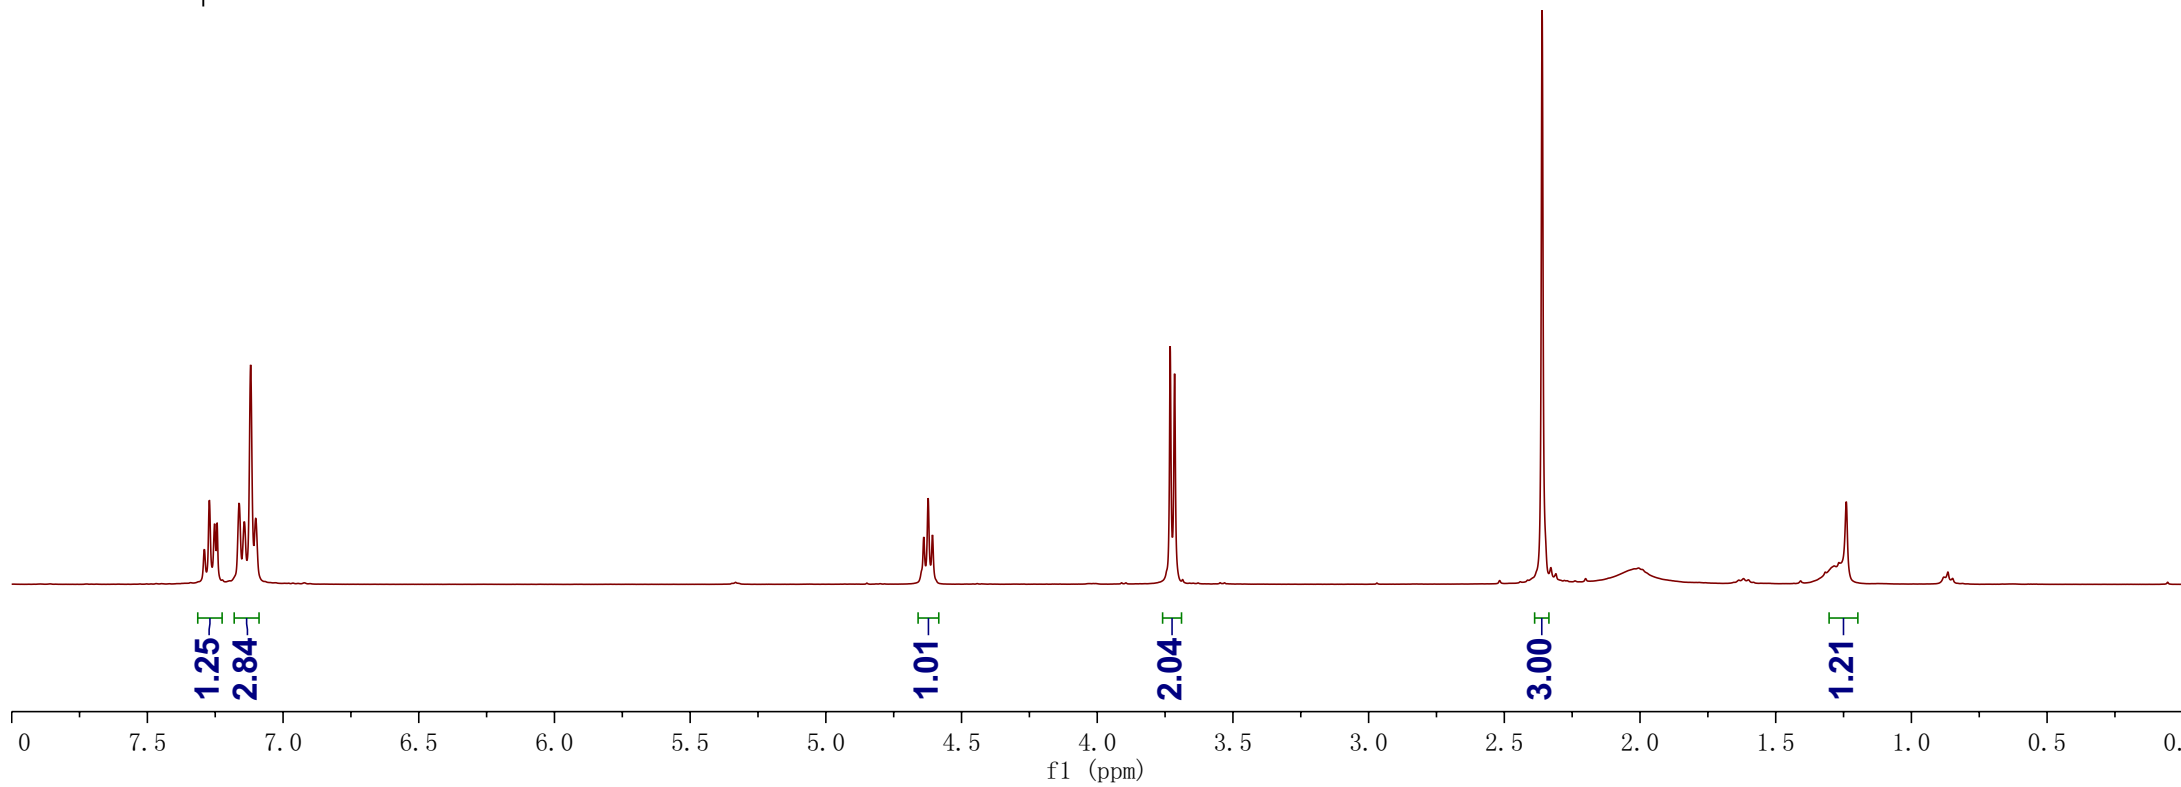

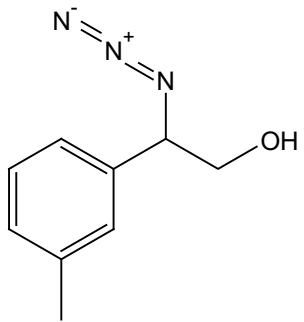

138.85  
136.26  
129.63  
128.95  
127.94  
124.33

77.16 Chloroform-d

68.02  
66.59

21.56

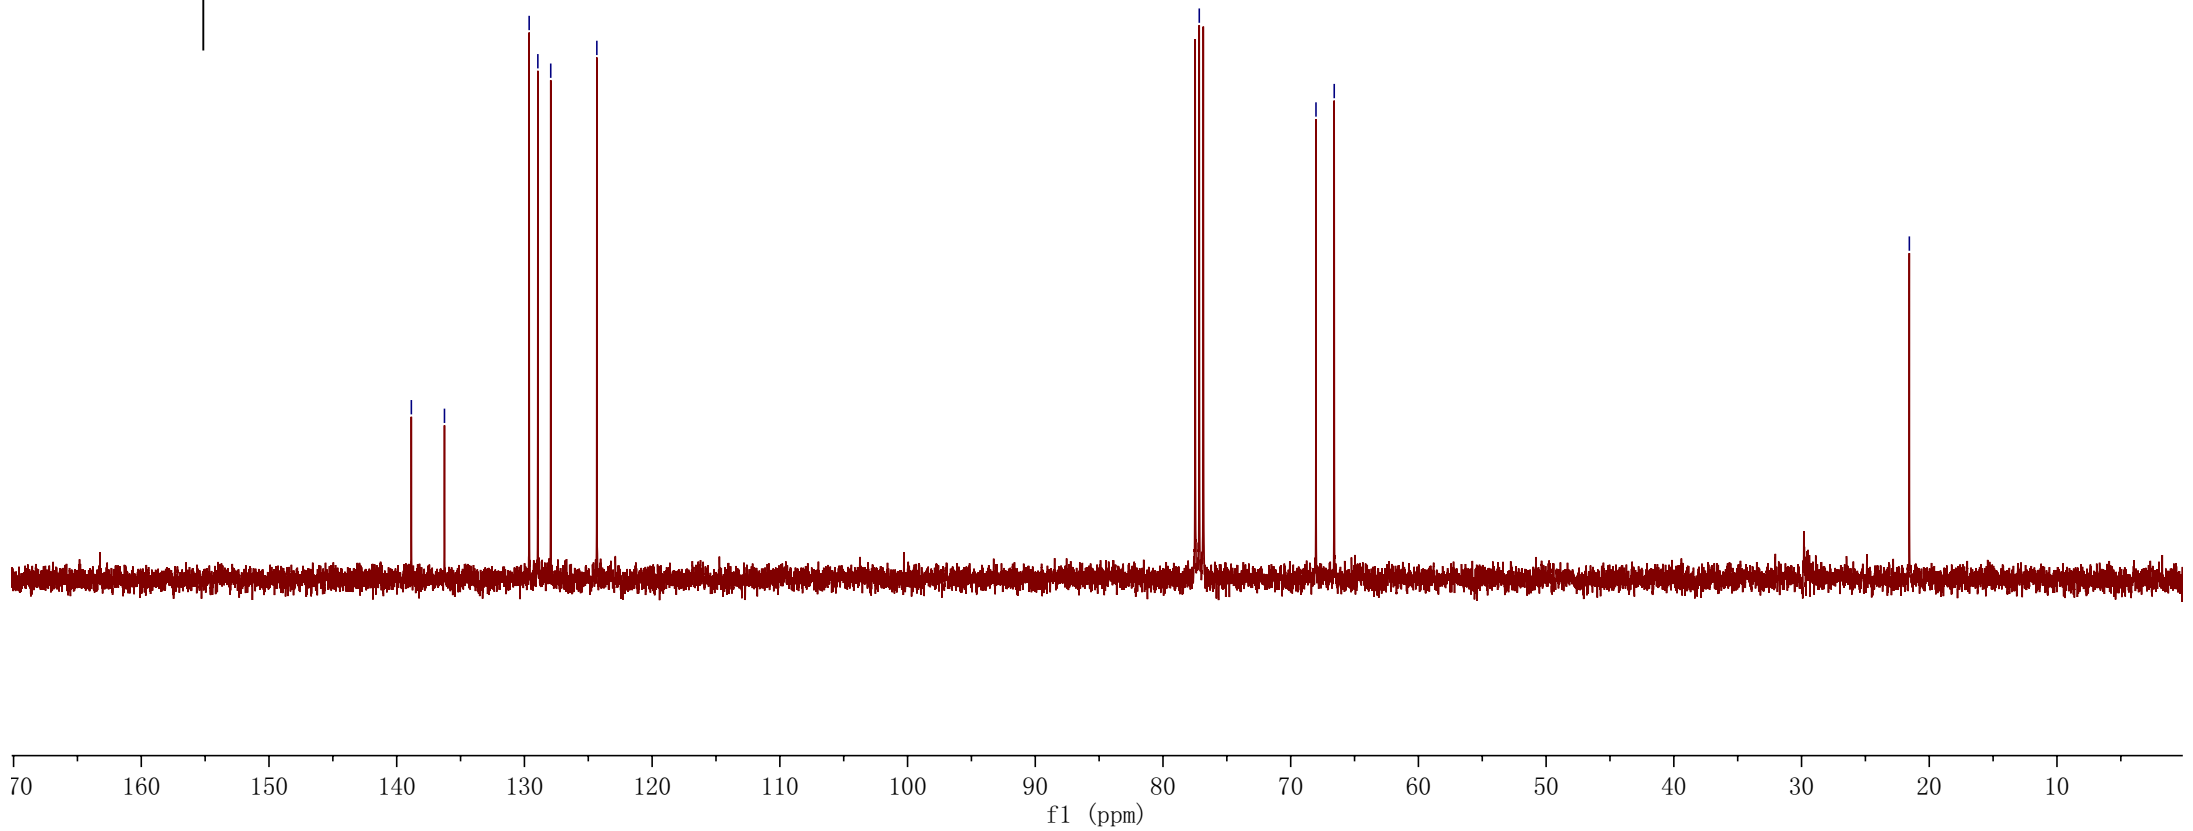

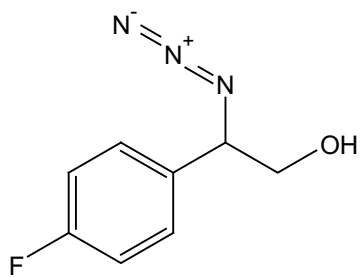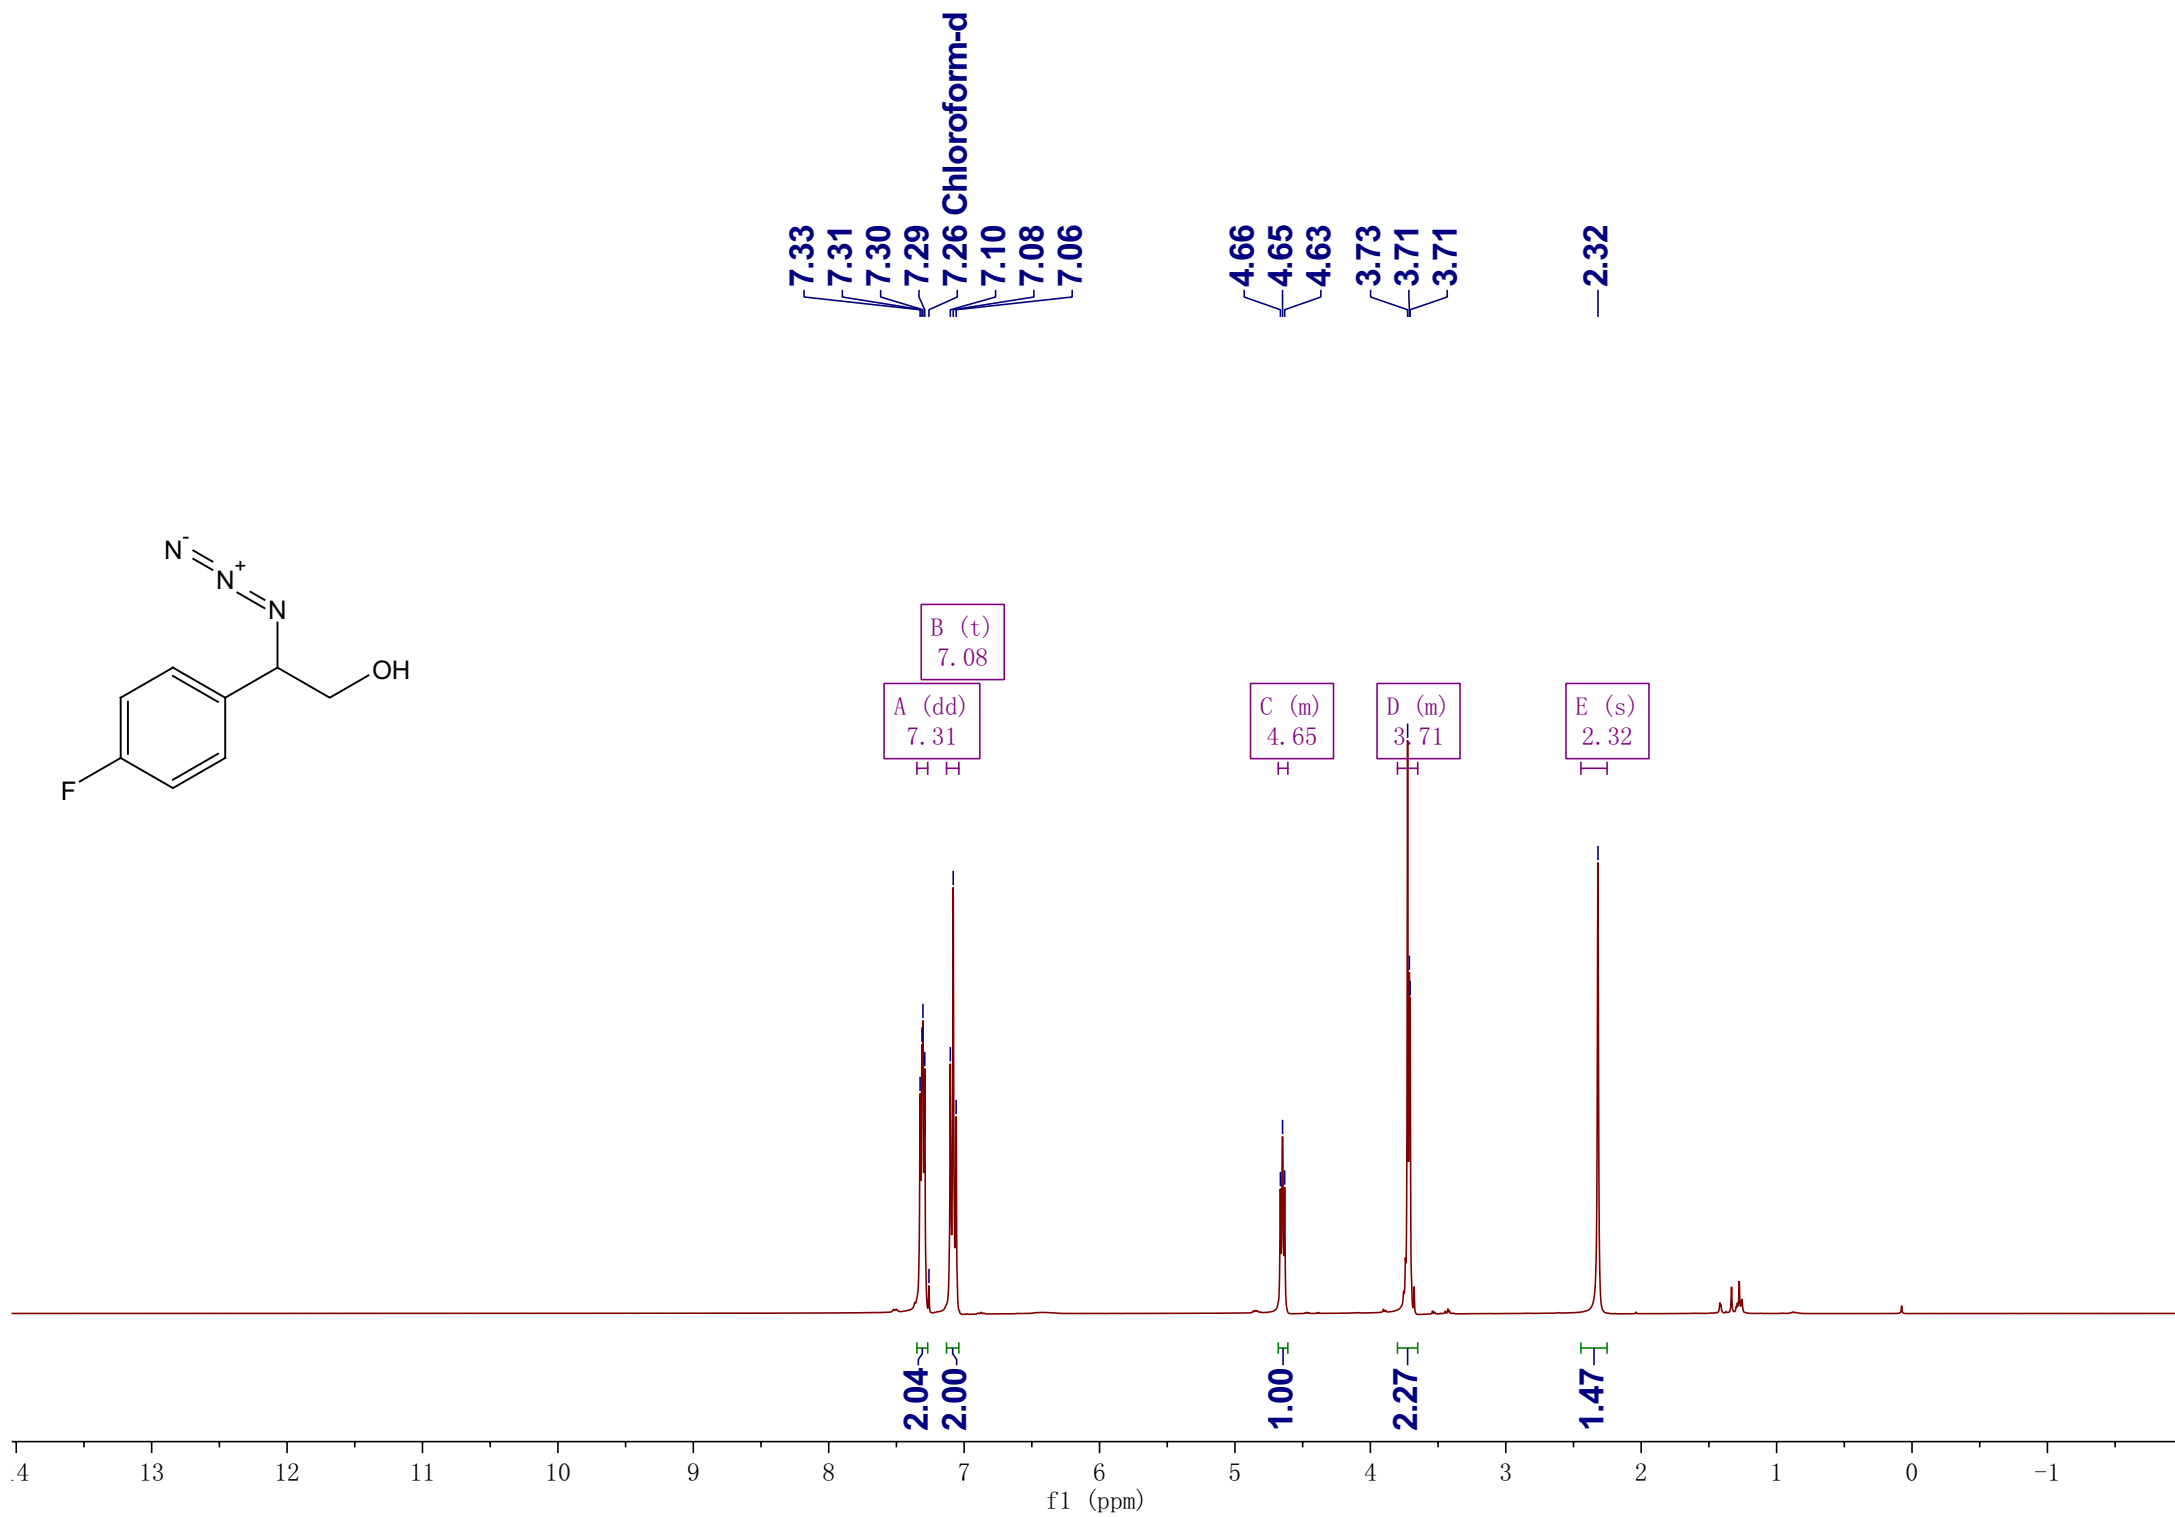

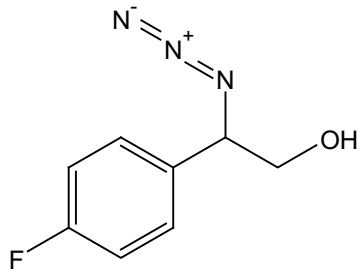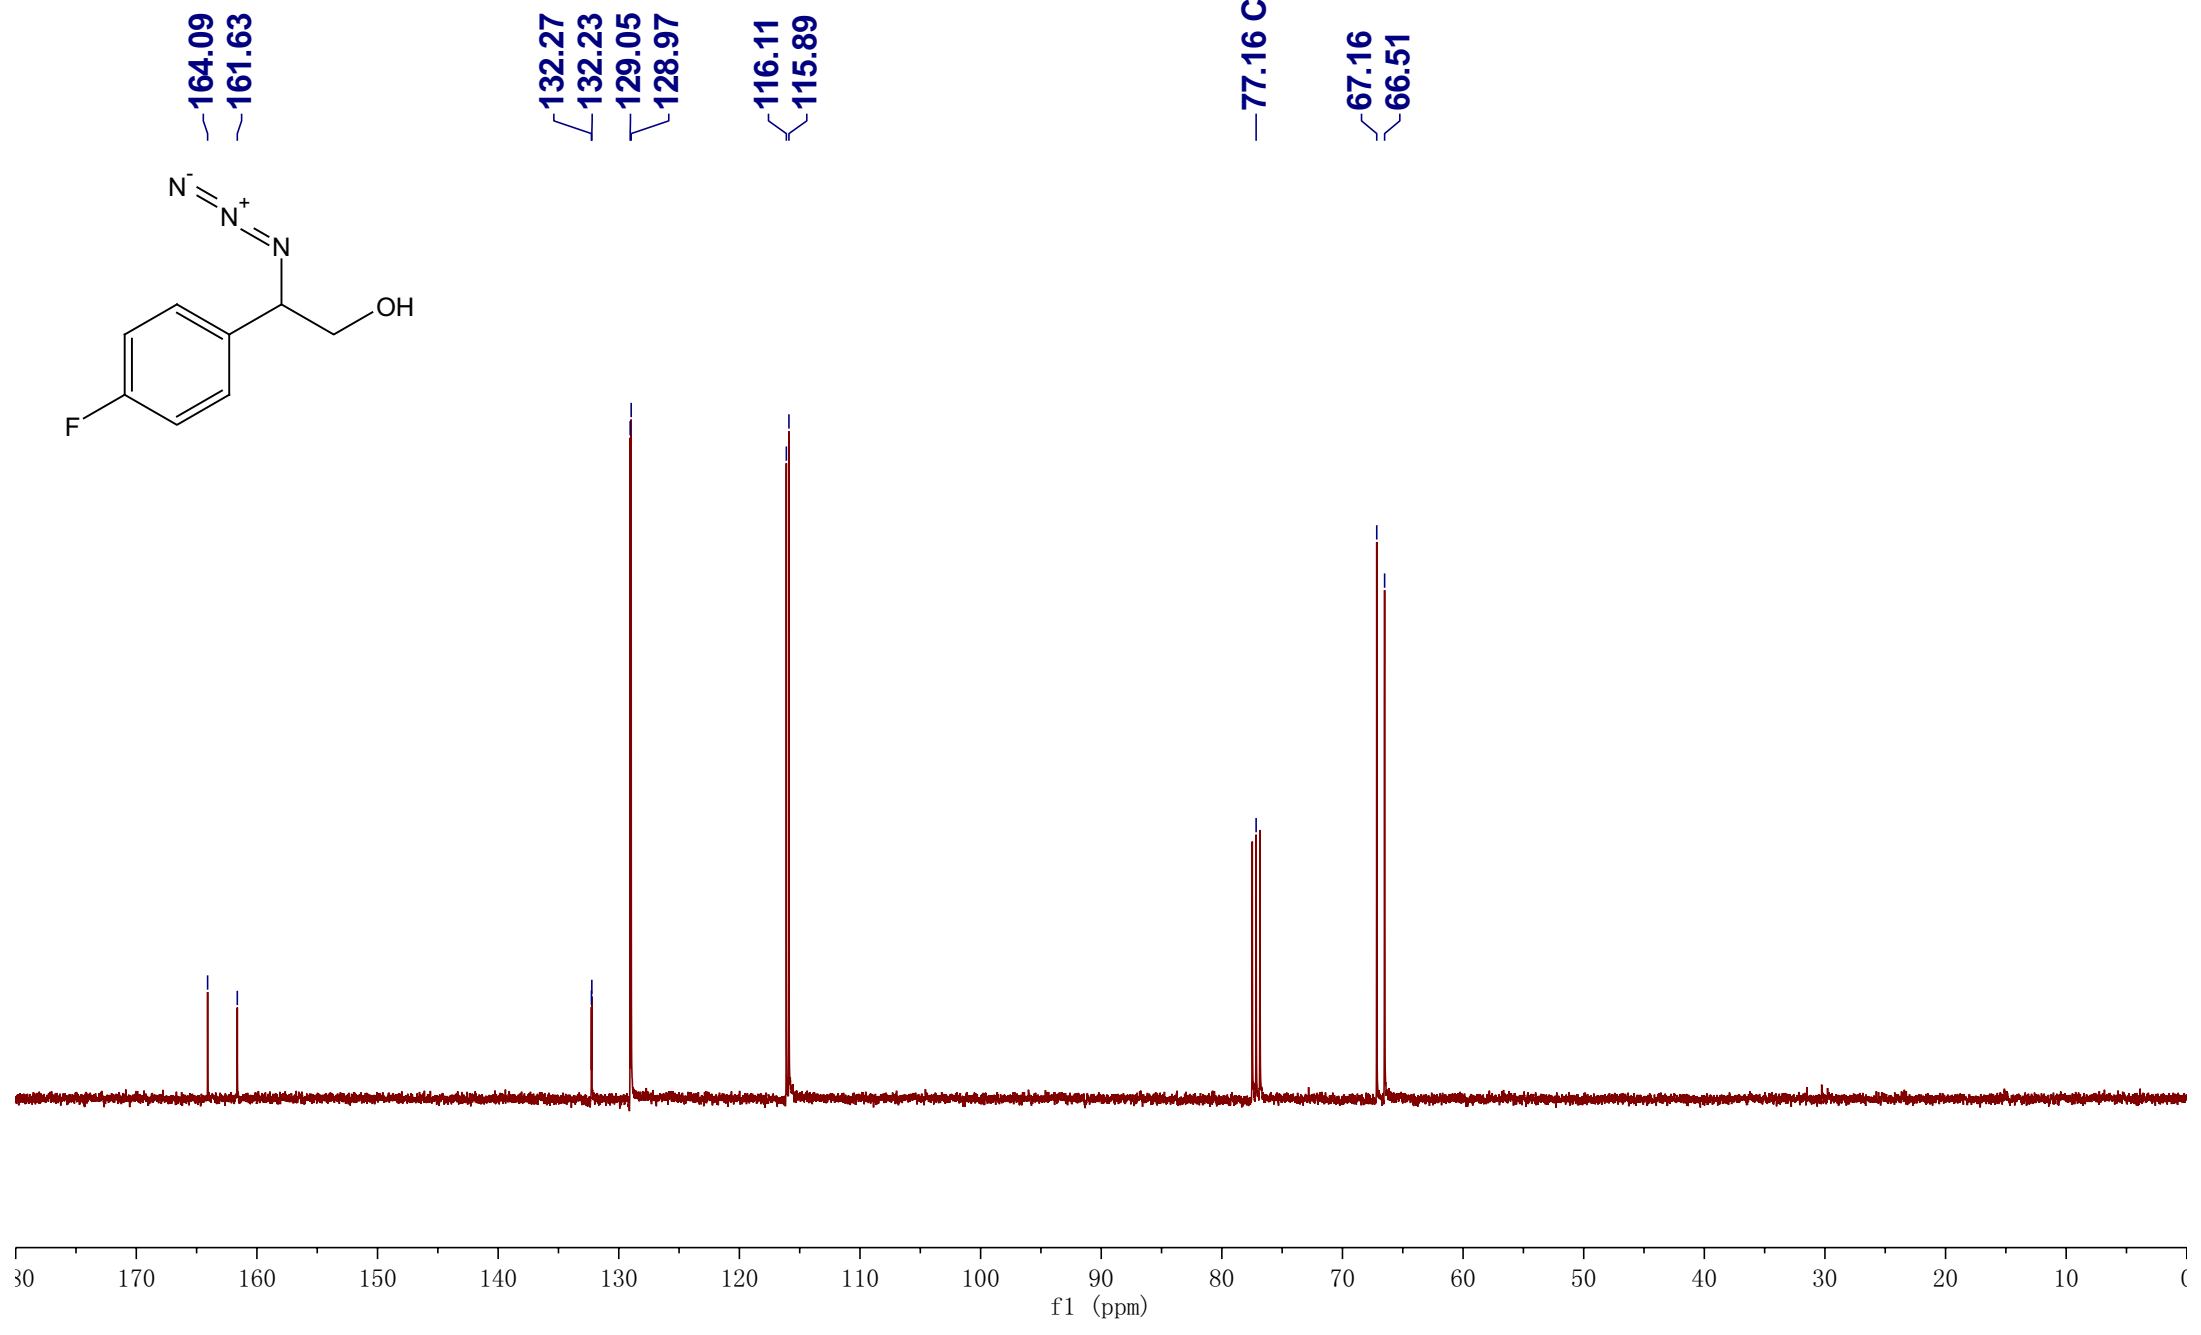

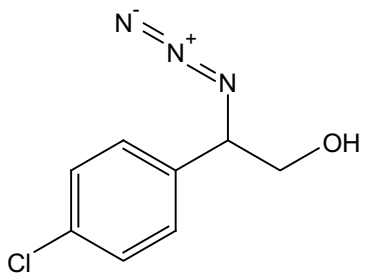

7.36  
7.34  
7.26  
7.24

4.64  
4.62  
4.62  
4.61  
3.73  
3.72  
3.70  
3.70  
3.69  
3.68  
3.67  
3.65

2.34

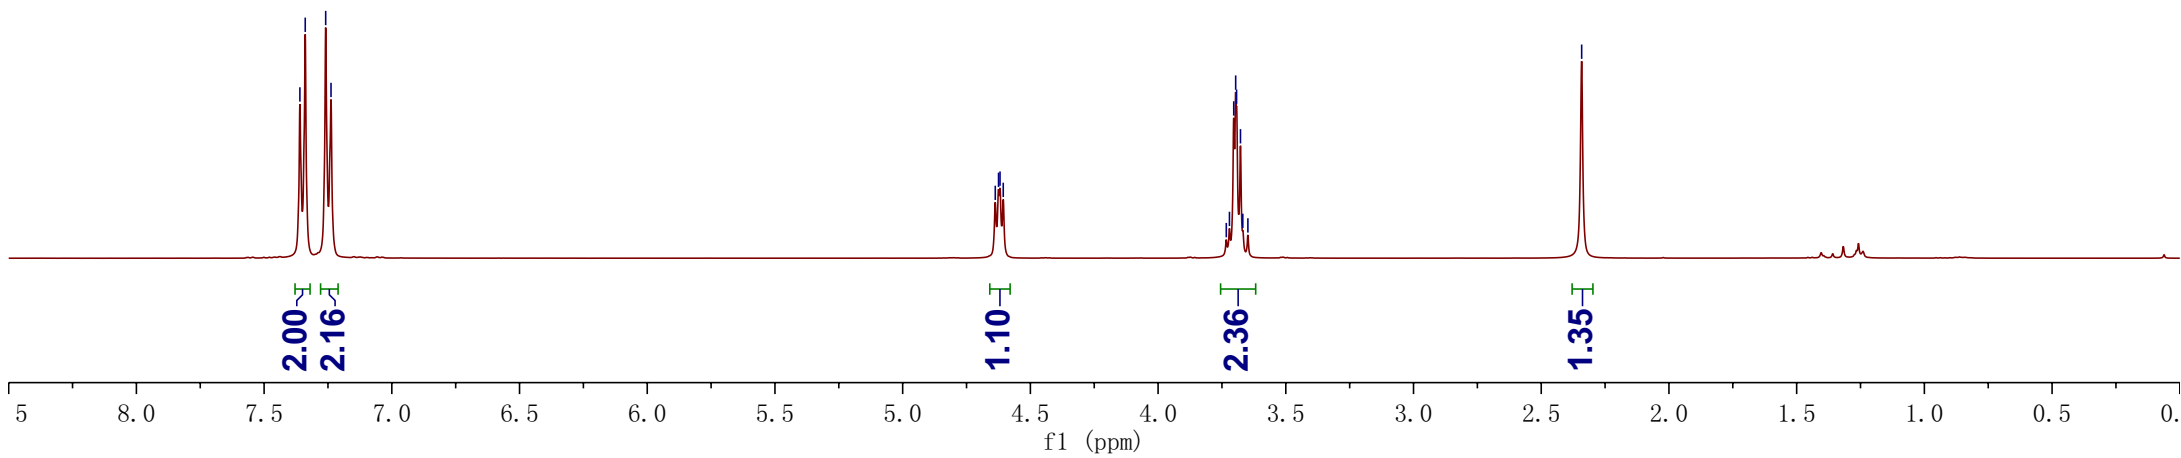

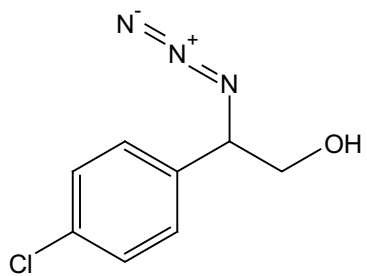

134.92  
134.63  
129.21  
128.59

77.16 Chloroform-d

67.14  
66.43

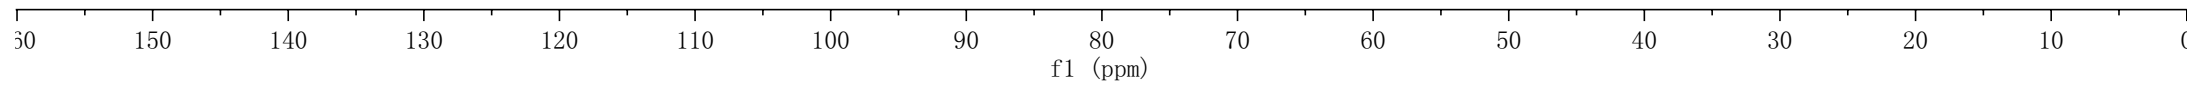



Chloroform-d

7.54  
7.52  
7.26  
7.22  
7.20

4.65  
4.64  
4.63  
4.62

3.73  
3.72  
3.70

1.99

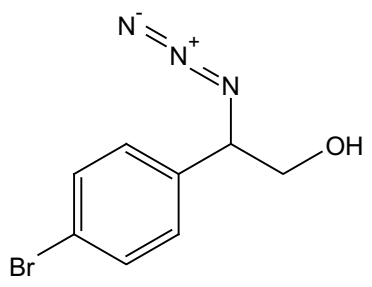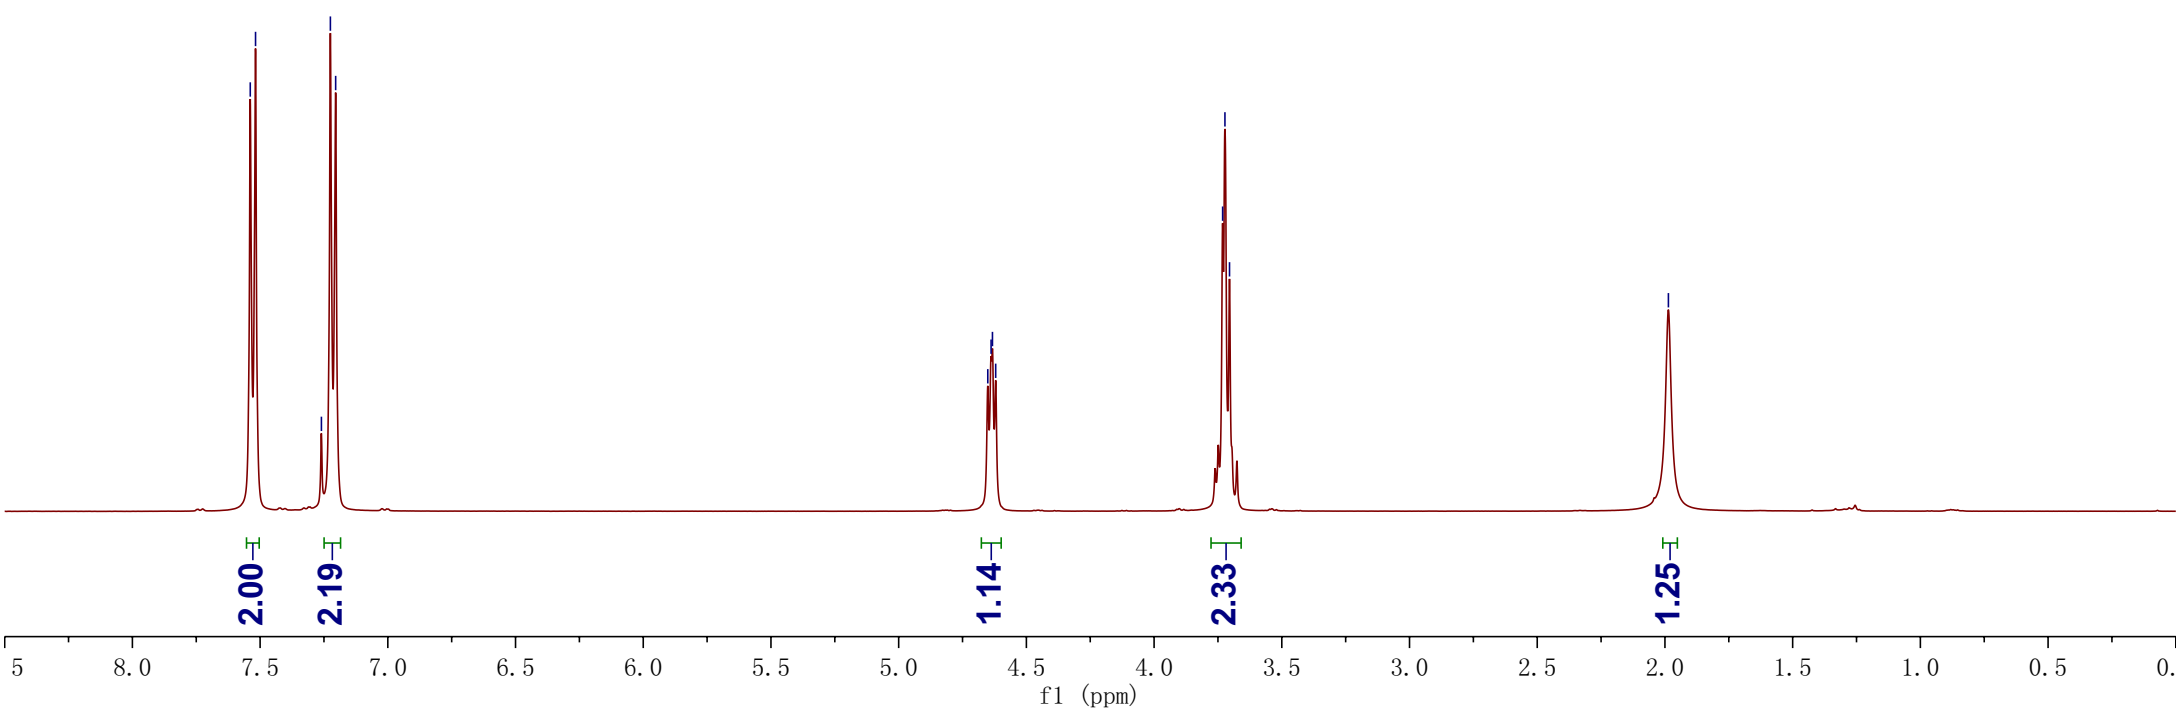

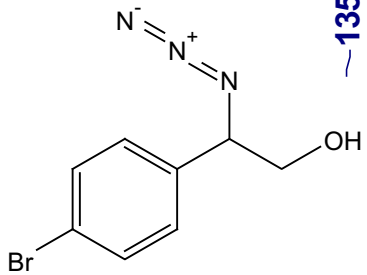

135.50

132.25

128.96

122.88

77.16 Chloroform-d

67.28

66.51

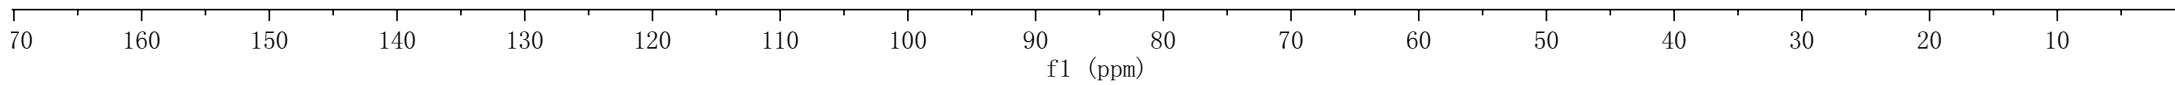

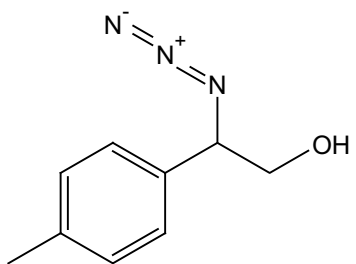

7.28

4.71  
4.70  
4.68

3.80  
3.78

2.62  
2.43

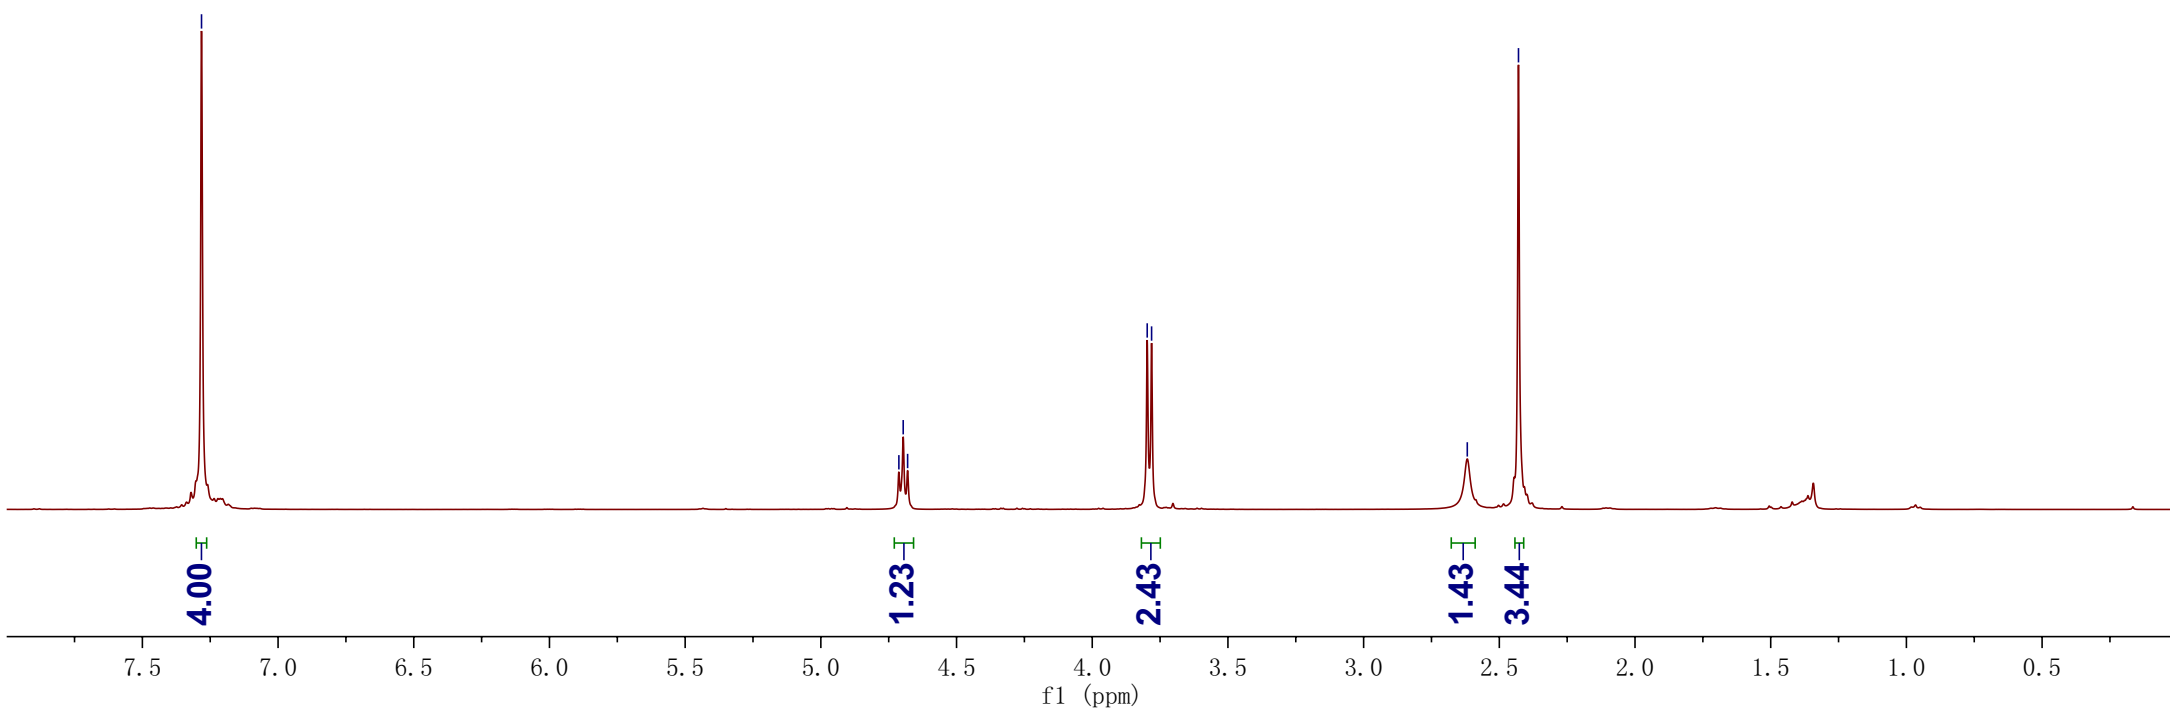

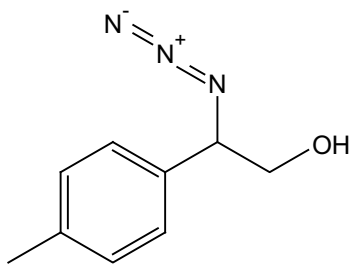

138.97  
133.59  
129.99  
129.63  
127.49

77.16 Chloroform-d

68.04  
66.76

21.54

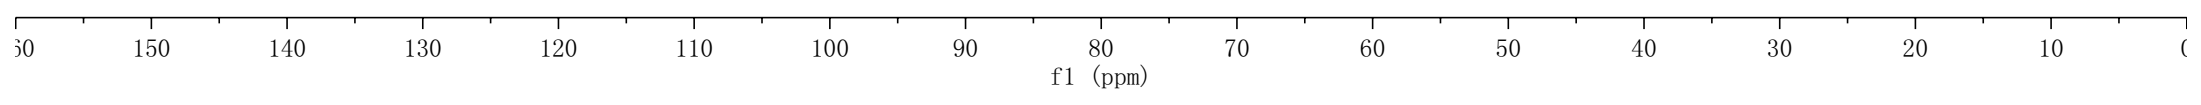

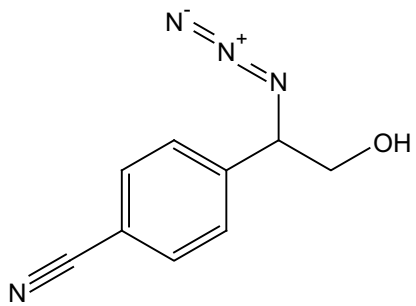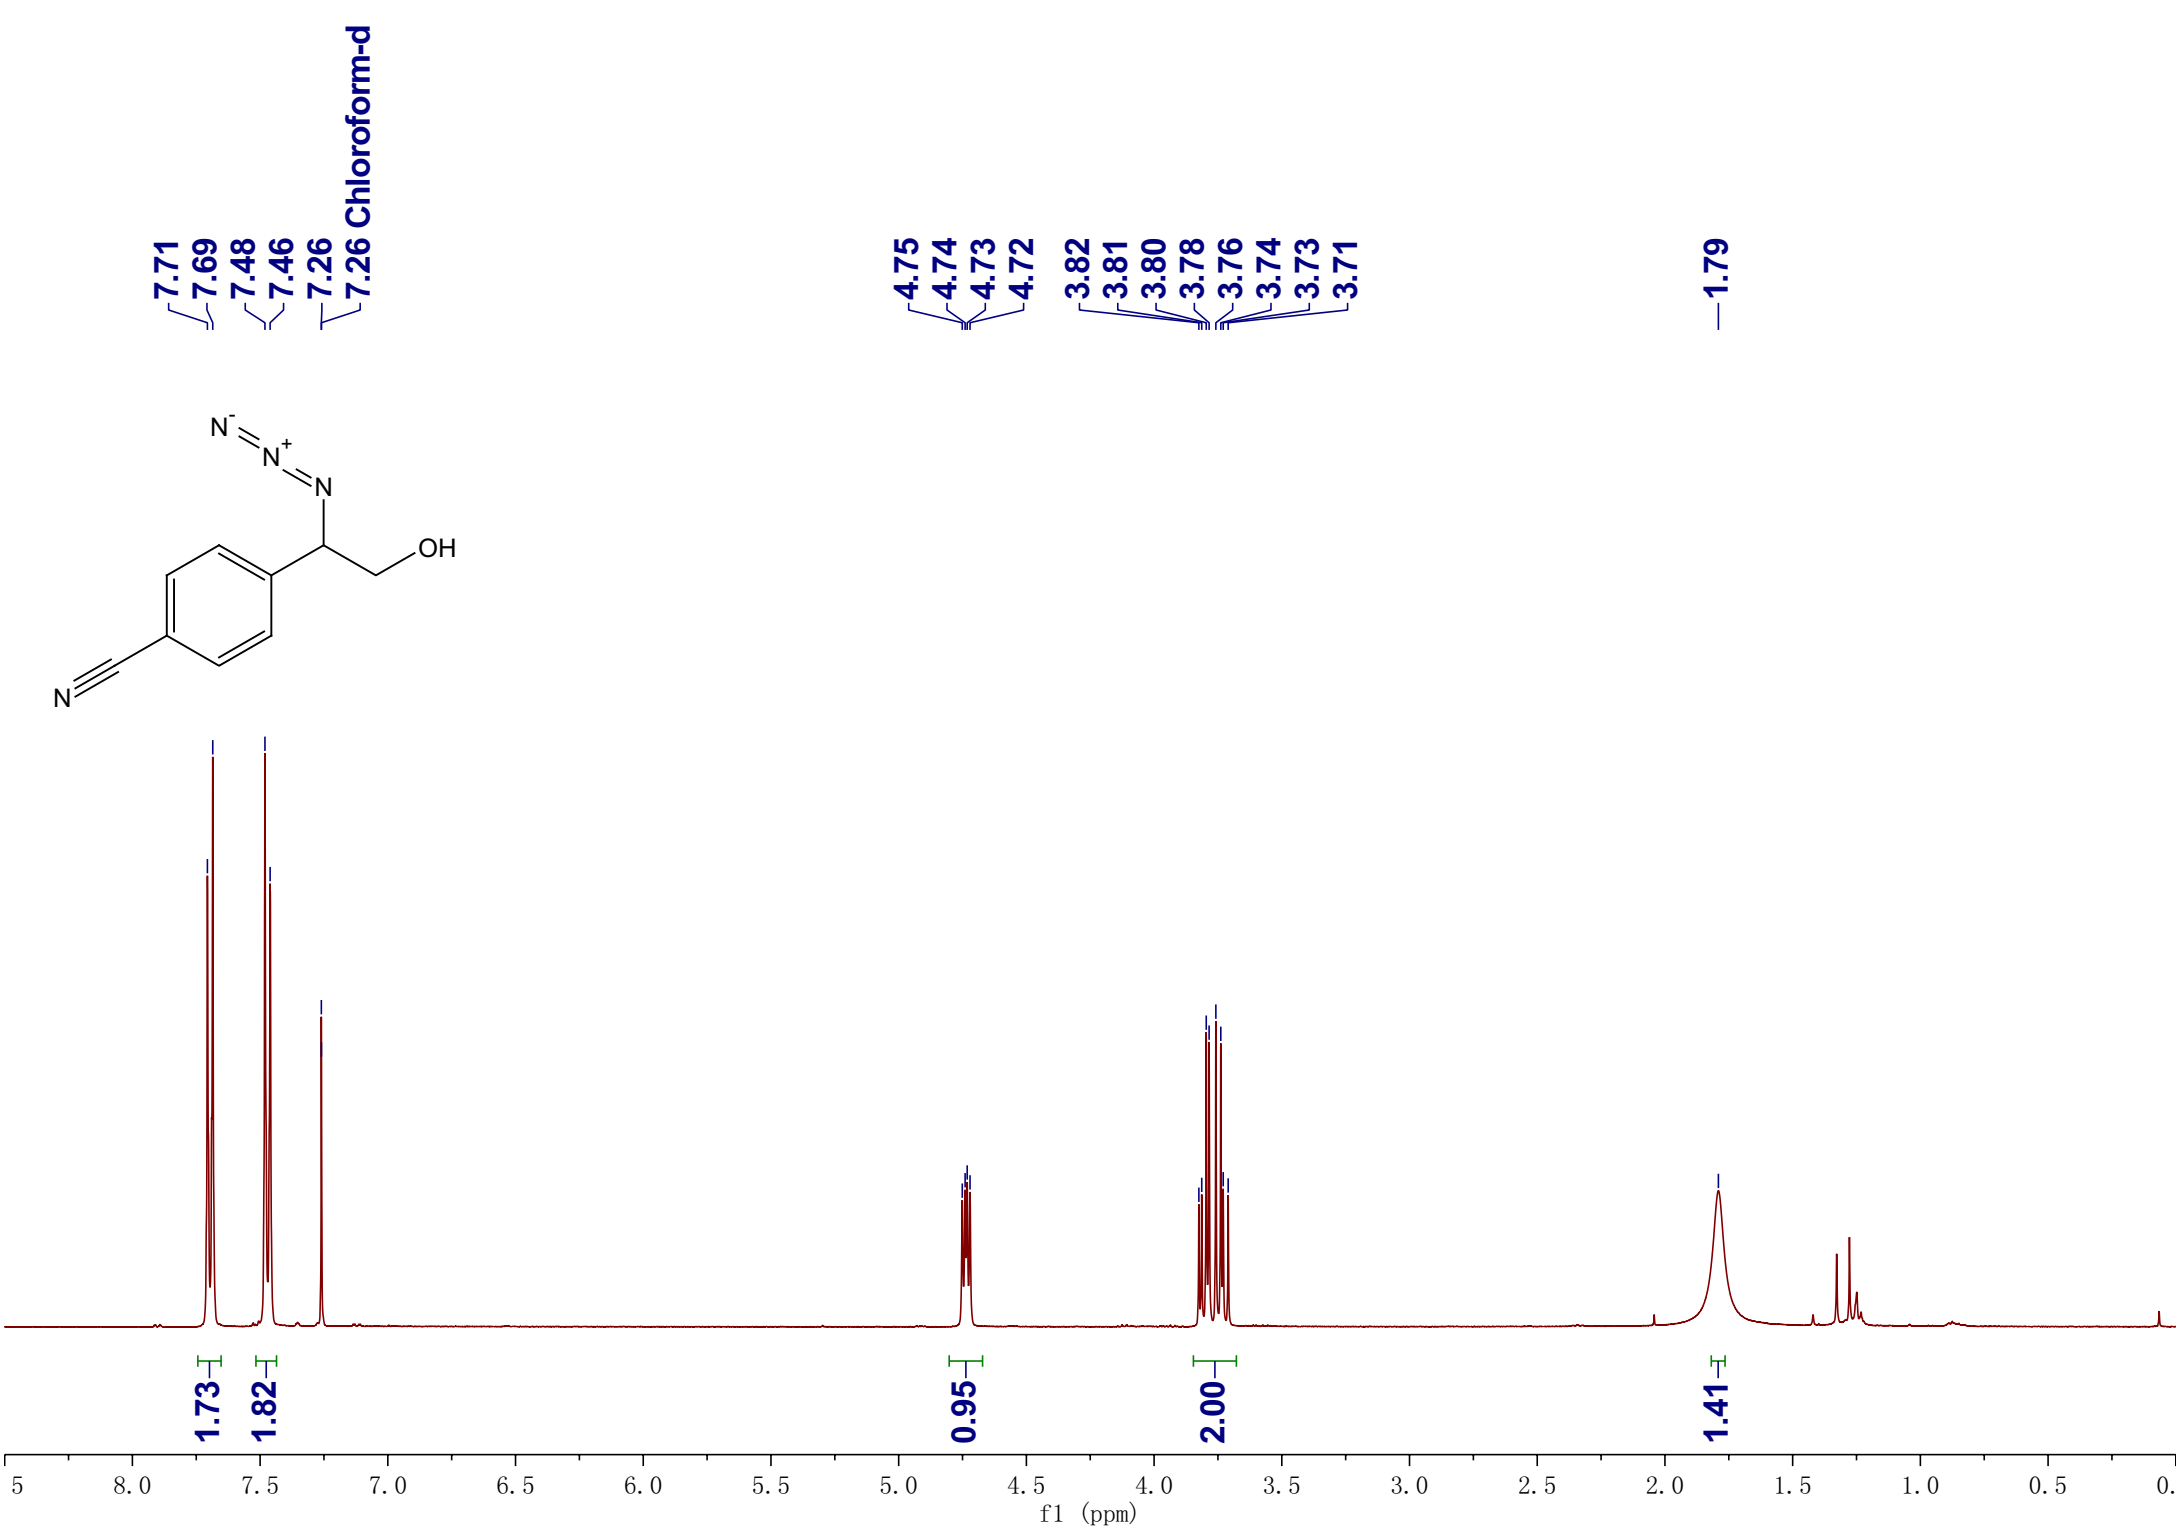

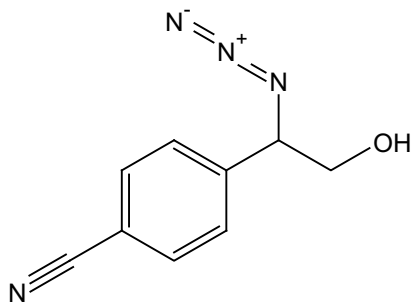

138.90  
133.51  
129.92  
129.55  
127.42

77.16 Chloroform-d

67.97  
66.69

21.46

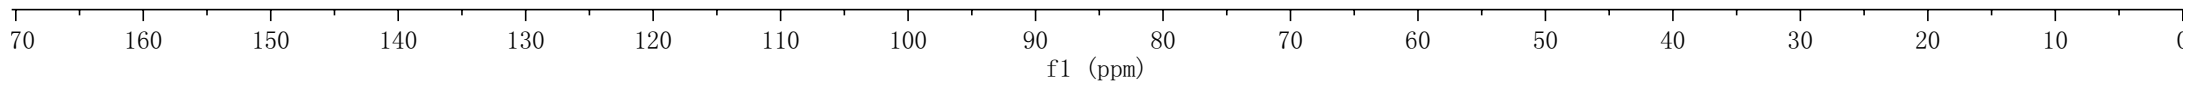

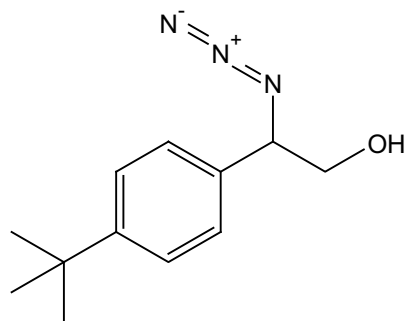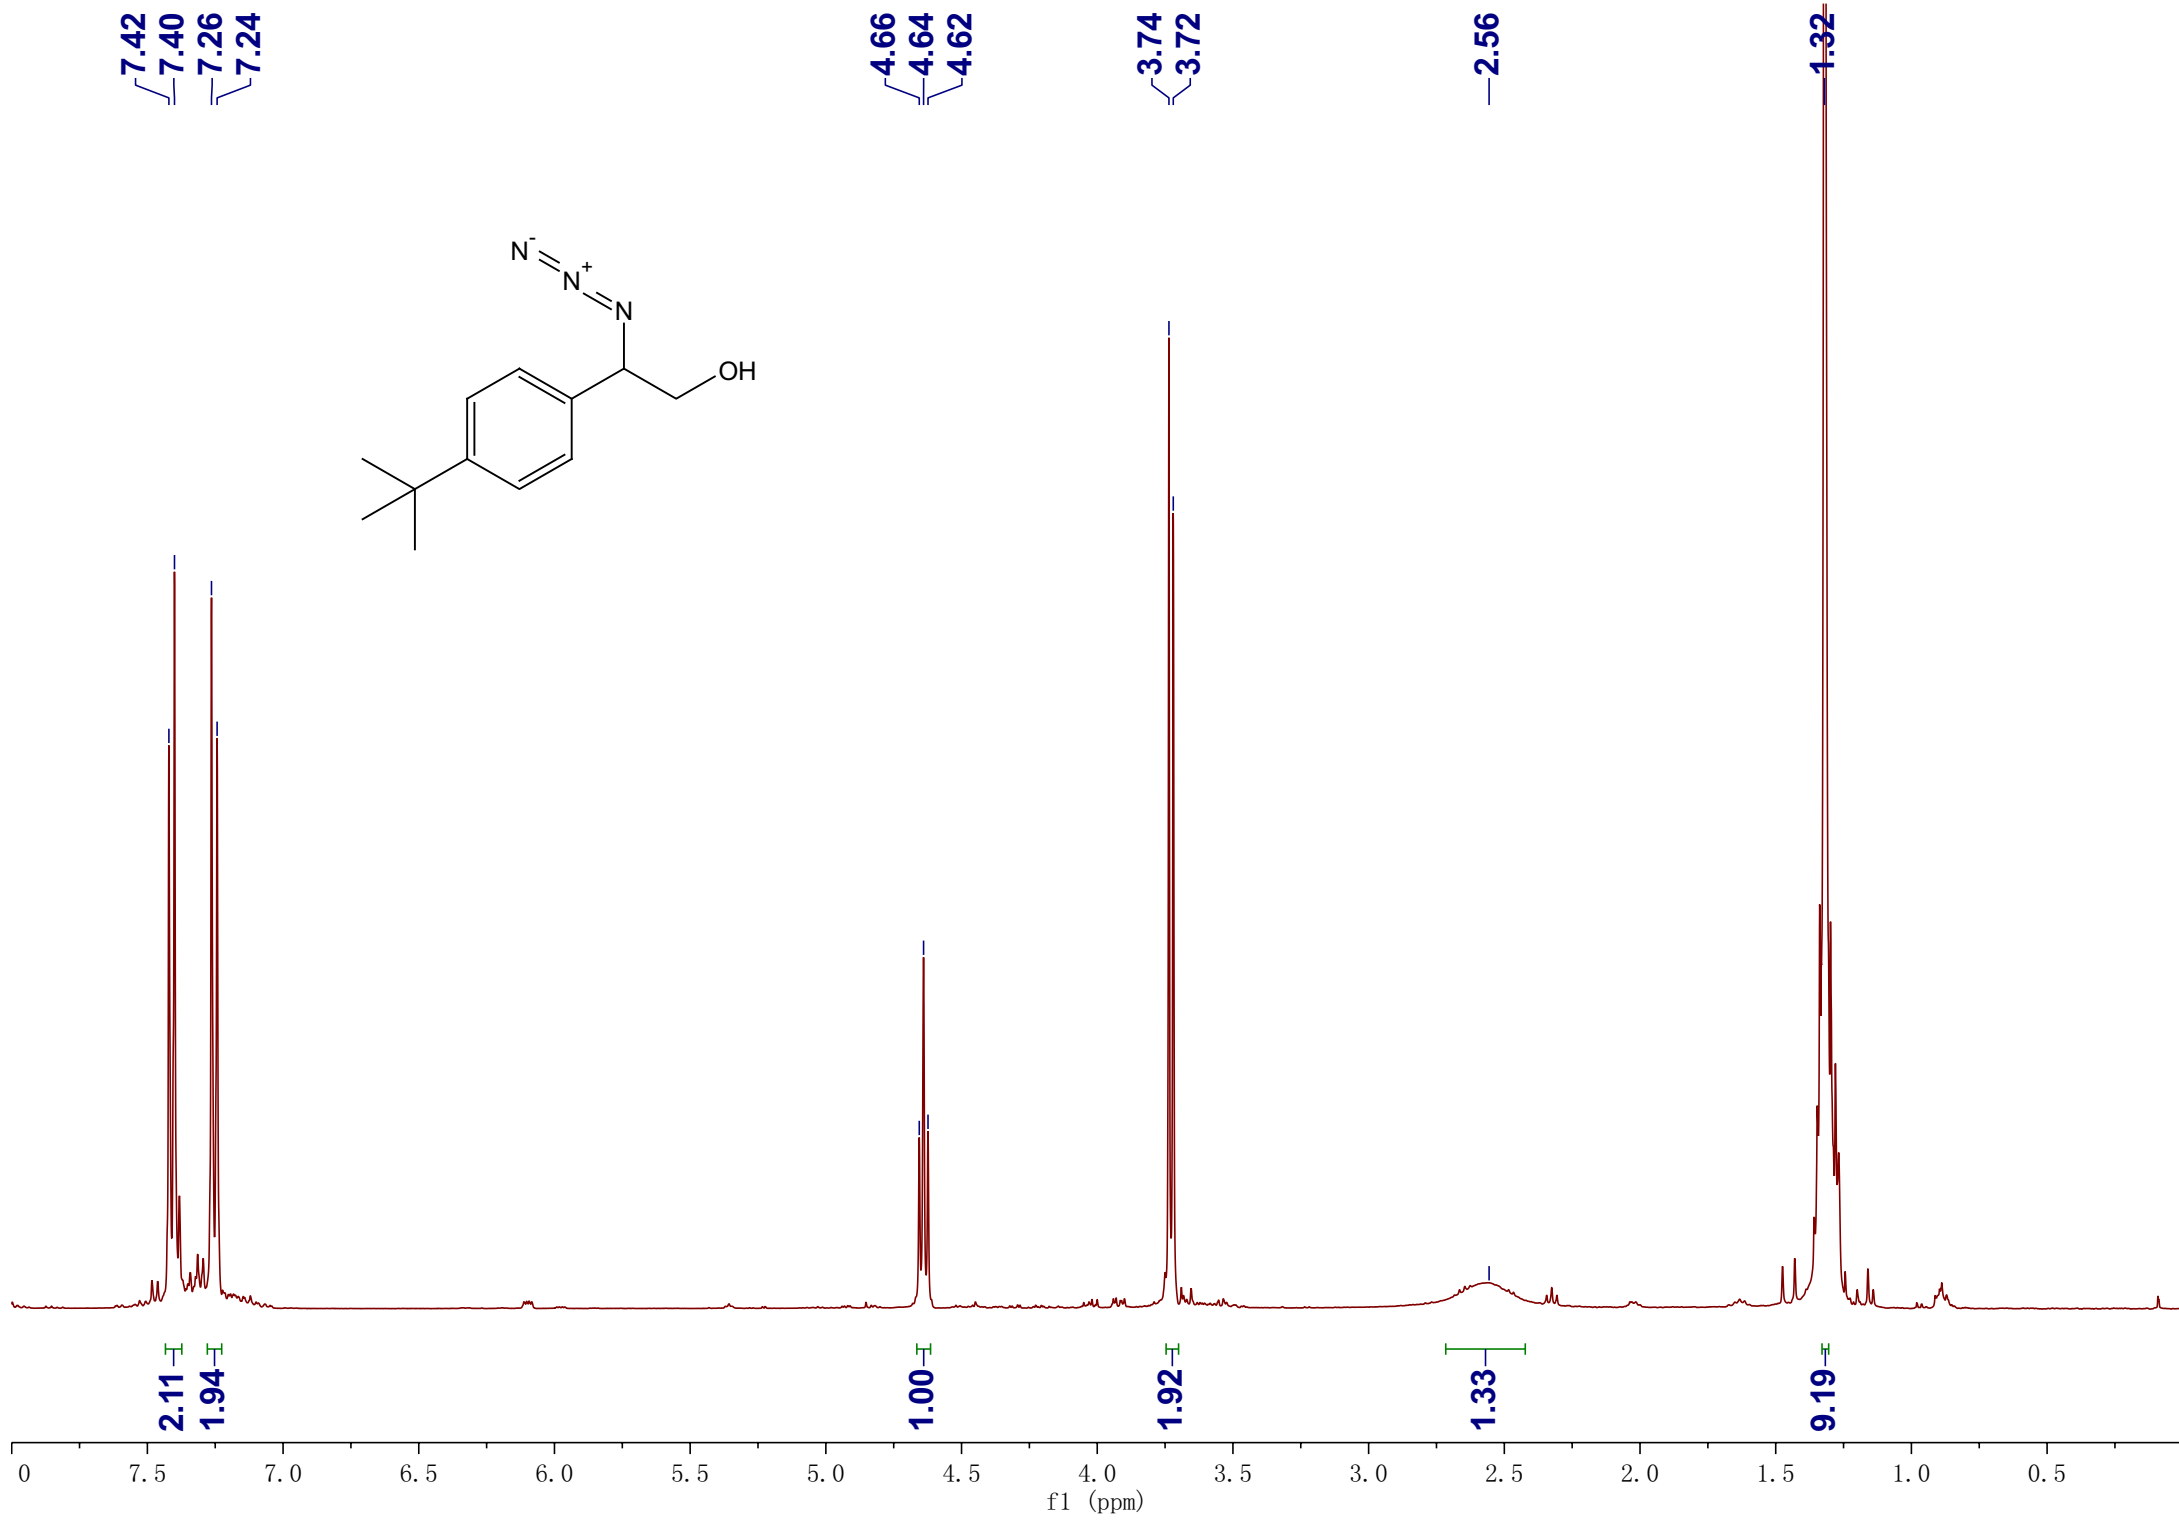

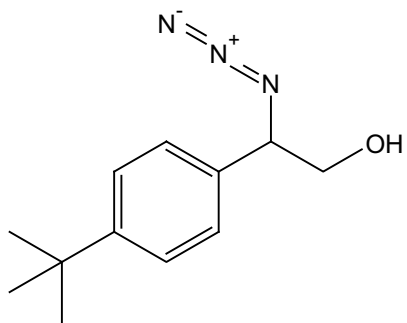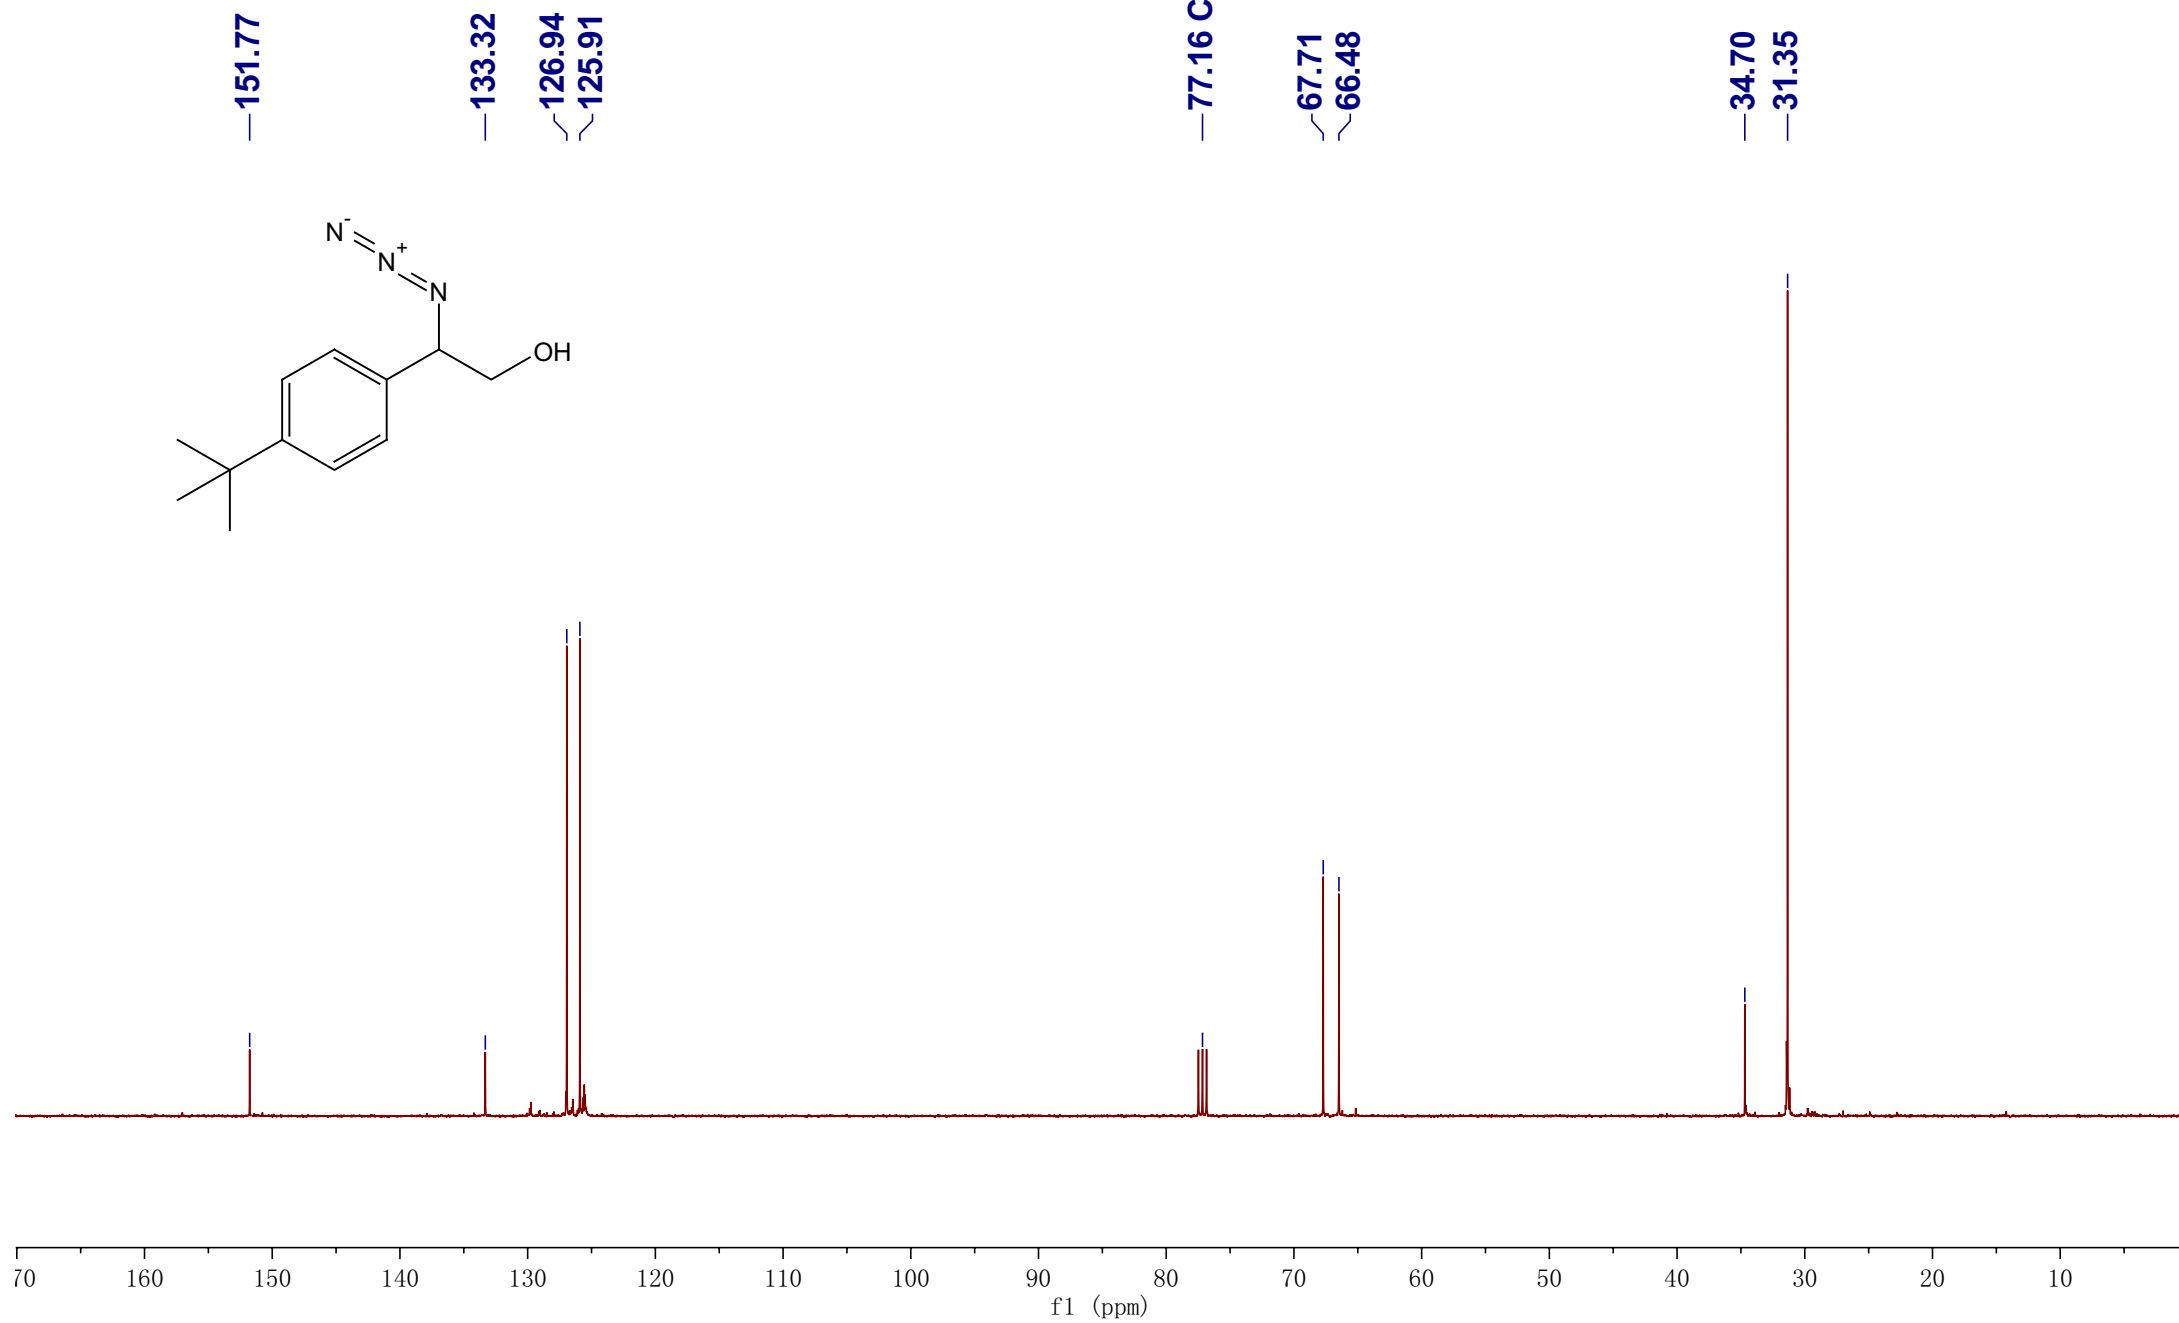

Supplement: c9ra03774h1.pdf [file c9ra03774h1.pdf]
